# Supplementary material for: Bile and urine peptide marker profiles: access keys to molecular pathways and biological processes in cholangiocarcinoma
Source: PubMed Central journal article supplement (PMC6941325; doi:10.1186/s12929-019-0599-5), 2020-01-03
Supplement: 12929_2019_599_MOESM1_ESM.pdf [file 12929_2019_599_MOESM1_ESM.pdf]

**Table S1.** Clinical and demographic data of patients analyzed in this study by combined bile and urine proteome analysis for CCA diagnosis.

| Patient group                                              | Malignant biliary stricture case groups |                   | Benign biliary stricture control groups |                  | P for malignant to benign group differences* | AUC for CCA diagnosis |
|------------------------------------------------------------|-----------------------------------------|-------------------|-----------------------------------------|------------------|----------------------------------------------|-----------------------|
|                                                            | CCA                                     | CCA on top of PSC | PSC                                     | BBD              |                                              |                       |
| Patients, n                                                | 33                                      | 19                | 57                                      | 19               |                                              |                       |
| <b>Type of biliary disease (n)</b>                         |                                         |                   |                                         |                  |                                              |                       |
| Cholelithiasis                                             |                                         |                   |                                         | 10               |                                              |                       |
| Chronic pancreatitis                                       |                                         |                   |                                         | 3                |                                              |                       |
| SSC                                                        |                                         |                   |                                         | 3                |                                              |                       |
| CBD dilatation                                             |                                         |                   |                                         | 3                |                                              |                       |
| <b>Clinical and demographic parameters (normal values)</b> |                                         |                   |                                         |                  |                                              |                       |
| Age, years, mean/range                                     | 63/35-85                                | 46/22-68          | 43/21-83                                | 60/35-84         | 0.0004                                       | 0.68                  |
| Female/male, n/n                                           | 11/22                                   | 4/15              | 13/44                                   | 8/11             | 1.00                                         | n.d.                  |
| Alkaline phosphatase (35 – 104 U/L), mean/range            | 395/61-1023                             | 342/128-670       | 300/47-1475                             | 251/51-1173      | 0.001                                        | 0.68                  |
| $\gamma$ -Glutamyltransferase (< 39 U/L), mean/range       | 521/10-2212                             | 379/83-937        | 352/15-3638                             | 304/30-1340      | 0.002                                        | 0.67                  |
| Bilirubin (< 17 $\mu$ mol/L), mean/range                   | 131/4-502                               | 112/5-506         | 48/4-260                                | 30/5-126         | 0.006                                        | 0.65                  |
| Leucocyte count (4-10/nL), mean/range                      | 8.5/3.6-20.8                            | 8.5/0.8-18.0      | 7.3/1.0-20.0                            | 6.4/2.3-10.9     | 0.15                                         | 0.58                  |
| C-reactive protein (< 8 mg/L), mean/range                  | 45/1-184                                | 33/3-215          | 14/1-91                                 | 28/1-190         | 0.002                                        | 0.67                  |
| Alanine aminotransferase (< 35 U/L), mean/range            | 96/14-551                               | 205/27-716        | 90/15-548                               | 56/16-205        | 0.031                                        | 0.62                  |
| Aspartate aminotransferase (< 32 U/L), mean/range          | 90/18-333                               | 169/23-767        | 77/6-378                                | 52/24-110        | 0.004                                        | 0.66                  |
| Carbohydrate antigen 19-9 (< 27 kU/L), mean/range          | 3562/1-81243                            | 785/1-3955        | 56/1-293                                | 146/1-543        | <0.0001                                      | 0.75                  |
| <b>Number of detected peptides</b>                         |                                         |                   |                                         |                  |                                              |                       |
| in urine, mean/range                                       | 1901/750-3462                           | 2113/1033-3800    | 2036/946-3036                           | 1859/1270-2940   | 0.69                                         | 0.52                  |
| in bile, mean/range                                        | 1562/320-4158                           | 1827/423-4488     | 1653/327-4165                           | 2018/491-3458    | 0.42                                         | 0.54                  |
| <b>Classification factors by proteome analysis</b>         |                                         |                   |                                         |                  |                                              |                       |
| Bile proteome analysis (BPA)                               | 0.59/-1.24-2.28                         | 0.14/-1.74-1.65   | -0.36/-1.49-1.16                        | 0.05/-1.12-1.40  | <0.0001                                      | 0.79                  |
| Urine proteome analysis (UPA)                              | -0.11/-2.41-2.74                        | 0.22/-0.82-3.19   | -1.49/-3.13-1.09                        | -1.48/-2.64-0.27 | <0.0001                                      | 0.90                  |
| Combined BPA and UPA                                       | 2.40/-3.14-10.29                        | 2.44/-3.73-13.05  | -2.98/-9.16-4.69                        | -2.38/-6.08-0.94 | <0.0001                                      | 0.92                  |

\*Two-tailed probability for continuous data and significance level by Fisher exact test for categorical data.

Abbreviations: AUC, area under the curve; BBD, benign biliary disease; CBD, common bile duct; CCA, cholangiocarcinoma; n.d., not determined; PSC, primary sclerosing cholangitis; SSC, secondary sclerosing cholangitis.

**Table S2.** Observed and *in silico* predicted protease associations to the N- and C-terminal amino acid sequence motifs of the bile and urine peptides included in the bile and urinary proteomic models for CCA diagnosis. Confirmed cleavage site associations are based on the MEROPS peptide database, whereas *in silico* protease prediction was done by the software tool Proteasix.

| Evidence level*                              | Biofluid    | CCA peptide marker sequence                 | Parental protein                                      | Protease cleavage at the peptide's N-terminal end†                                                                                                             | Peptide sequence including flanking cleavage motifs | Protease cleavage at the peptide's C-terminal end†             |
|----------------------------------------------|-------------|---------------------------------------------|-------------------------------------------------------|----------------------------------------------------------------------------------------------------------------------------------------------------------------|-----------------------------------------------------|----------------------------------------------------------------|
| Observed                                     | Bile        | 173-FYAPPELLFFAK-183                        | Serum albumin                                         | MEP1B (M12.004) <sup>[1]</sup>                                                                                                                                 | RHPY.FYAPPELLFFAK                                   |                                                                |
|                                              |             | 2-VHLTPEEKSAVTA-14                          | Hemoglobin subunit β                                  | unknown peptidase <sup>[2]</sup>                                                                                                                               | M.VHLTPEEKSAVTA.LWGK                                | CAPN1 (C02.001) <sup>[3]</sup> / CTSD (A01.009) <sup>[4]</sup> |
|                                              |             | 28-SVTEQGAELSNEER-41                        | 14-3-3 protein ζ/δ                                    | CTSL (C01.032) <sup>[5]</sup> / CTSK (C01.036) <sup>[5]</sup> / CTSS (C01.034) <sup>[5]</sup> / CTSV (C01.009) <sup>[5]</sup> / PRSS1 (S01.151) <sup>[6]</sup> | ACMK.SVTEQGAELSNEER.NLLS                            | PRSS1 (S01.151) <sup>[6]</sup>                                 |
|                                              | Urine       | 26-DFDDFNLED-34                             | CD99 antigen-like protein 2                           | unknown peptidase <sup>[2]</sup>                                                                                                                               | RGSG.DFDDFNLED                                      |                                                                |
|                                              |             | 97-DGVSGGEGKGGSDGGGSHRKEGEEADAPGVIPGIVG-132 | CD99 antigen                                          | MEP1B (M12.004) <sup>[7]</sup>                                                                                                                                 | ADLA.DGVSGGEGKGGSDGGGSHRKEGEEADAPGVIPGIVG           |                                                                |
| Predicted                                    | Bile        | 27-AEALERmFL-35                             | Hemoglobin subunit α                                  | ADAMTS4 (M12.221)                                                                                                                                              | GEYG.AEALERmFL.SFPT                                 | CMA1 (S01.140) / KLK4 (S01.251)                                |
|                                              |             | 173-FYAPPELLFFAK-183                        | Serum albumin                                         | CMA1 (S01.140)                                                                                                                                                 | RHPY.FYAPPELLFFAK                                   |                                                                |
|                                              |             | 179-DLAGRDLTDYm-190                         | Actin, cytoplasmic 1                                  | CMA1 (S01.140) / ADAMTS4 (M12.221) / KLK4 (S01.251)                                                                                                            | ILRL.DLAGRDLTDYm                                    |                                                                |
|                                              |             | 28-SVTEQGAELSNEER-41                        | 14-3-3 protein ζ/δ                                    |                                                                                                                                                                | SVTEQGAELSNEER.NLLS                                 | ADAMTS4 (M12.221)                                              |
|                                              |             | 381-ILLTDGDPVTGETNPR-396                    | Inter-α-trypsin inhibitor heavy chain H4              |                                                                                                                                                                | ILLTDGDPVTGETNPR.SIQN                               | KLK4 (S01.251)                                                 |
|                                              |             | 43-FESFGDLSTPDVAmGNPK-60                    | Hemoglobin subunit β                                  | CMA1 (S01.140)                                                                                                                                                 | TQRF.FESFGDLSTPDVAmGNPK                             |                                                                |
|                                              | Urine       | 589-SGSVIDQSR-597                           | Uromodulin                                            | ADAMTS4 (M12.221) / KLK6 (S01.236)                                                                                                                             | TRFR.SGSVIDQSR.VLNL                                 | CASP1 (C14.001) / KLK6 (S01.236)                               |
|                                              |             | 26-DFDDFNLED-34                             | CD99 antigen-like protein 2                           |                                                                                                                                                                | DFDDFNLED.AVKE                                      | ADAMTS4 (M12.221) / CASP1 (C14.001)                            |
|                                              |             | 613-DGEAGAQGPpGPA-625                       | Collagen α-1(I) chain                                 | ADAMTS4 (M12.221) / KLK6 (S01.236)                                                                                                                             | PAGK.DGEAGAQGPpGPA                                  |                                                                |
|                                              |             | 657-KpGEQGVpGDLG-668                        | Collagen α-1(I) chain                                 | ADAMTS4 (M12.221)                                                                                                                                              | GEAG.KpGEQGVpGDLG                                   |                                                                |
|                                              |             | 1007-GpGESGREGApG-1019                      | Collagen α-1(I) chain                                 |                                                                                                                                                                | GpGESGREGApG.AEGS                                   | ADAMTS4 (M12.221)                                              |
|                                              |             | 1701-GlpGEmGSpGEPG-1713                     | Collagen α-6(VI) chain                                | CASP1 (C14.001)                                                                                                                                                | MISA.GlpGEmGSpGEPG                                  |                                                                |
|                                              |             | 918-RpGEVGPpGPpGP-930                       | Collagen α-1(I) chain                                 | ADAMTS4 (M12.221)                                                                                                                                              | GPAG.RpGEVGPpGPpGP.AGEK                             | ADAMTS4 (M12.221)                                              |
|                                              |             | 651-pPGEAGKpGEQGVp-664                      | Collagen α-1(I) chain                                 |                                                                                                                                                                | pPGEAGKpGEQGVp.GDLG                                 |                                                                |
|                                              |             | 543-SpGSPGDGKTGPpGPAG-560                   | Collagen α-1(I) chain                                 | ADAMTS4 (M12.221) / CASP1 (C14.001)                                                                                                                            | GLTG.SpGSPGDGKTGPpGPAG.QDGR                         | ADAMTS4 (M12.221)                                              |
|                                              |             | 54-SGSDDEPPPLPRL-68                         | Membrane-associated progesterone receptor component 1 |                                                                                                                                                                | SGSDDEPPPLPRL.KRRD                                  | ADAMTS4 (M12.221)                                              |
|                                              |             | 288-EpGSpGENGApGQMGR-304                    | Collagen α-1(I) chain                                 | ADAMTS4 (M12.221)                                                                                                                                              | GPKG.EpGSpGENGApGQMGR.GLPG                          | CASP1 (C14.001)                                                |
|                                              |             | 1084-ApGPQGRGDKGETGERG-1101                 | Collagen α-1(III) chain                               |                                                                                                                                                                | ApGPQGRGDKGETGERG.AAGI                              | ADAMTS4 (M12.221)                                              |
|                                              |             | 550-DGKTGpPGPAGQDGRPGpGppG-572              | Collagen α-1(I) chain                                 | ADAMTS4 (M12.221)                                                                                                                                              | SPGP.DGKTGpPGPAGQDGRPGpGppG.ARGQ                    | ADAMTS4 (M12.221)                                              |
|                                              |             | 189-kGQpGApGVkGEpGpGENGTpGQTGARG-217        | Collagen α-2(I) chain                                 |                                                                                                                                                                | kGQpGApGVkGEpGpGENGTpGQTGARG.LPGE                   | ADAMTS4 (M12.221)                                              |
|                                              |             | 780-DKGESGpSgApGTGARGApGDRGEpGppG-809       | Collagen α-1(I) chain                                 | ADAMTS4 (M12.221)                                                                                                                                              | GAPG.DKGESGpSgApGTGARGApGDRGEpGppG                  |                                                                |
|                                              |             | 188-LkGQpGApGVkGEpGpGENGTpGQTGARG-217       | Collagen α-2(I) chain                                 | ADAMTS4 (M12.221)                                                                                                                                              | GLDG.LkGQpGApGVkGEpGpGENGTpGQTGARG.LPGE             | ADAMTS4 (M12.221)                                              |
|                                              |             | 188-LkGQpGApGVkGEpGpGENGTpGQTGARG-217       | Collagen α-2(I) chain                                 | ADAMTS4 (M12.221)                                                                                                                                              | GLDG.LkGQpGApGVkGEpGpGENGTpGQTGARG.LPGE             | ADAMTS4 (M12.221)                                              |
| 194-ESEELNGAYKAIPVAQDLNAPSDWDSRGKDSYETSQ-230 | Osteopontin |                                             | ESEELNGAYKAIPVAQDLNAPSDWDSRGKDSYETSQ.DDQS             | ADAMTS4 (M12.221)                                                                                                                                              |                                                     |                                                                |

\* The MEROPS peptidase database available at <https://www.ebi.ac.uk/merops/index.shtml> was screened for experimentally confirmed protease to cleavage site associations for the differentially expressed peptides leading to the list of observed assignments in the upper part of the table. The lower part of the table consist of *in silico* predicted protease assignments made by the online software tool Proteasix which is based on the specificity weight matrices provided by the MEROPS peptidase database. The MEROPS specificity matrix is a measure for the frequency of specific amino acids at each position in the experimentally confirmed cleavage site of a given protease. Proteasix transforms the specificity matrices to probability matrices by dividing the number of occurrences for each of the 20 possible amino acids with the total number of experimental observations. From the 25 billion combinations only those were kept with a probability score greater than the 99th percentile. Moreover, in order to eliminate false positive predictions, a high confidence threshold was calculated based on six thousand random sequences generated by the Expassy RandSeq tool and only those protease to cleavage site associations were considered below this threshold.

† Proteases were restricted to those of human origin. Proteases are specified with their gene names together with their MEROPS classification ID's in parentheses.

**Reference list:** [1] Bertenshaw GP, Turk BE, Hubbard SJ, Matters GL, Bylander JE, Crisman JM, et al. Marked differences between metalloproteases meprin A and B in substrate and peptide bond specificity. *J Biol Chem.* 2001;276:13248-55. [2] López-Pelegrín M, Cerdà-Costa N, Cintas-Pedrola A, Herranz-Trillo F, Bernadó P, Peinado JR, et al. Multiple stable conformations account for reversible concentration-dependent oligomerization and autoinhibition of a metamorphic metallopeptidase. *Angew Chem Int Ed Engl.* 2014;53:10624-30. [3] Shinkai-Ouchi F, Koyama S, Ono Y, Hata S, Ojima K, Shindo M, et al. Predictions of Cleavability of Calpain Proteolysis by Quantitative Structure-Activity Relationship Analysis Using Newly Determined Cleavage Sites and Catalytic Efficiencies of an Oligopeptide Array. *Mol Cell Proteomics.* 2016;15:1262-80. [4] Brindley PJ, Kalinna BH, Wong JY, Bogitsh BJ, King LT, Smyth DJ, et al. Proteolysis of human hemoglobin by schistosome cathepsin D. *Mol Biochem Parasitol.* 2001;112:103-12. [5] Vidmar R, Vizovišek M, Turk D, Turk B, Fonović M. Protease cleavage site fingerprinting by label-free in-gel degradomics reveals pH-dependent specificity switch of legumain. *EMBO J.* 2017;36:2455-65. [6] Schilling O, Overall CM. Proteome-derived, database-searchable peptide libraries for identifying protease cleavage sites. *Nat Biotechnol.* 2008;26:685-94. [7] Becker-Pauly C, Barré O, Schilling O, Auf dem Keller U, Ohler A, Broder C, et al. Proteomic analyses reveal an acidic prime side specificity for the astacin metalloprotease family reflected by physiological substrates. *Mol Cell Proteomics.* 2011;10:M111.009233.



**Figures S1-S24.** Box-and-whisker plot representations of RNA-seq mRNA levels given as “transcripts per million” (TPM) for all parental proteins and predicted proteases associated with the bile and urine CCA peptide markers in 18 CCA, 18 CCA-adjacent, 100 HCC, 53 HCC-adjacent and 35 normal liver tissue replicates. Transcriptomics data sets were retrieved from the “Pan-Cancer Analysis of Whole Genomes” project RNA-Seq mRNA repository available at <https://www.ebi.ac.uk/>. No RNA-seq data was available for UMOD, COL6A6, COL2A1, IL1RAPL1, KLK4, CMA1 and KLK6.

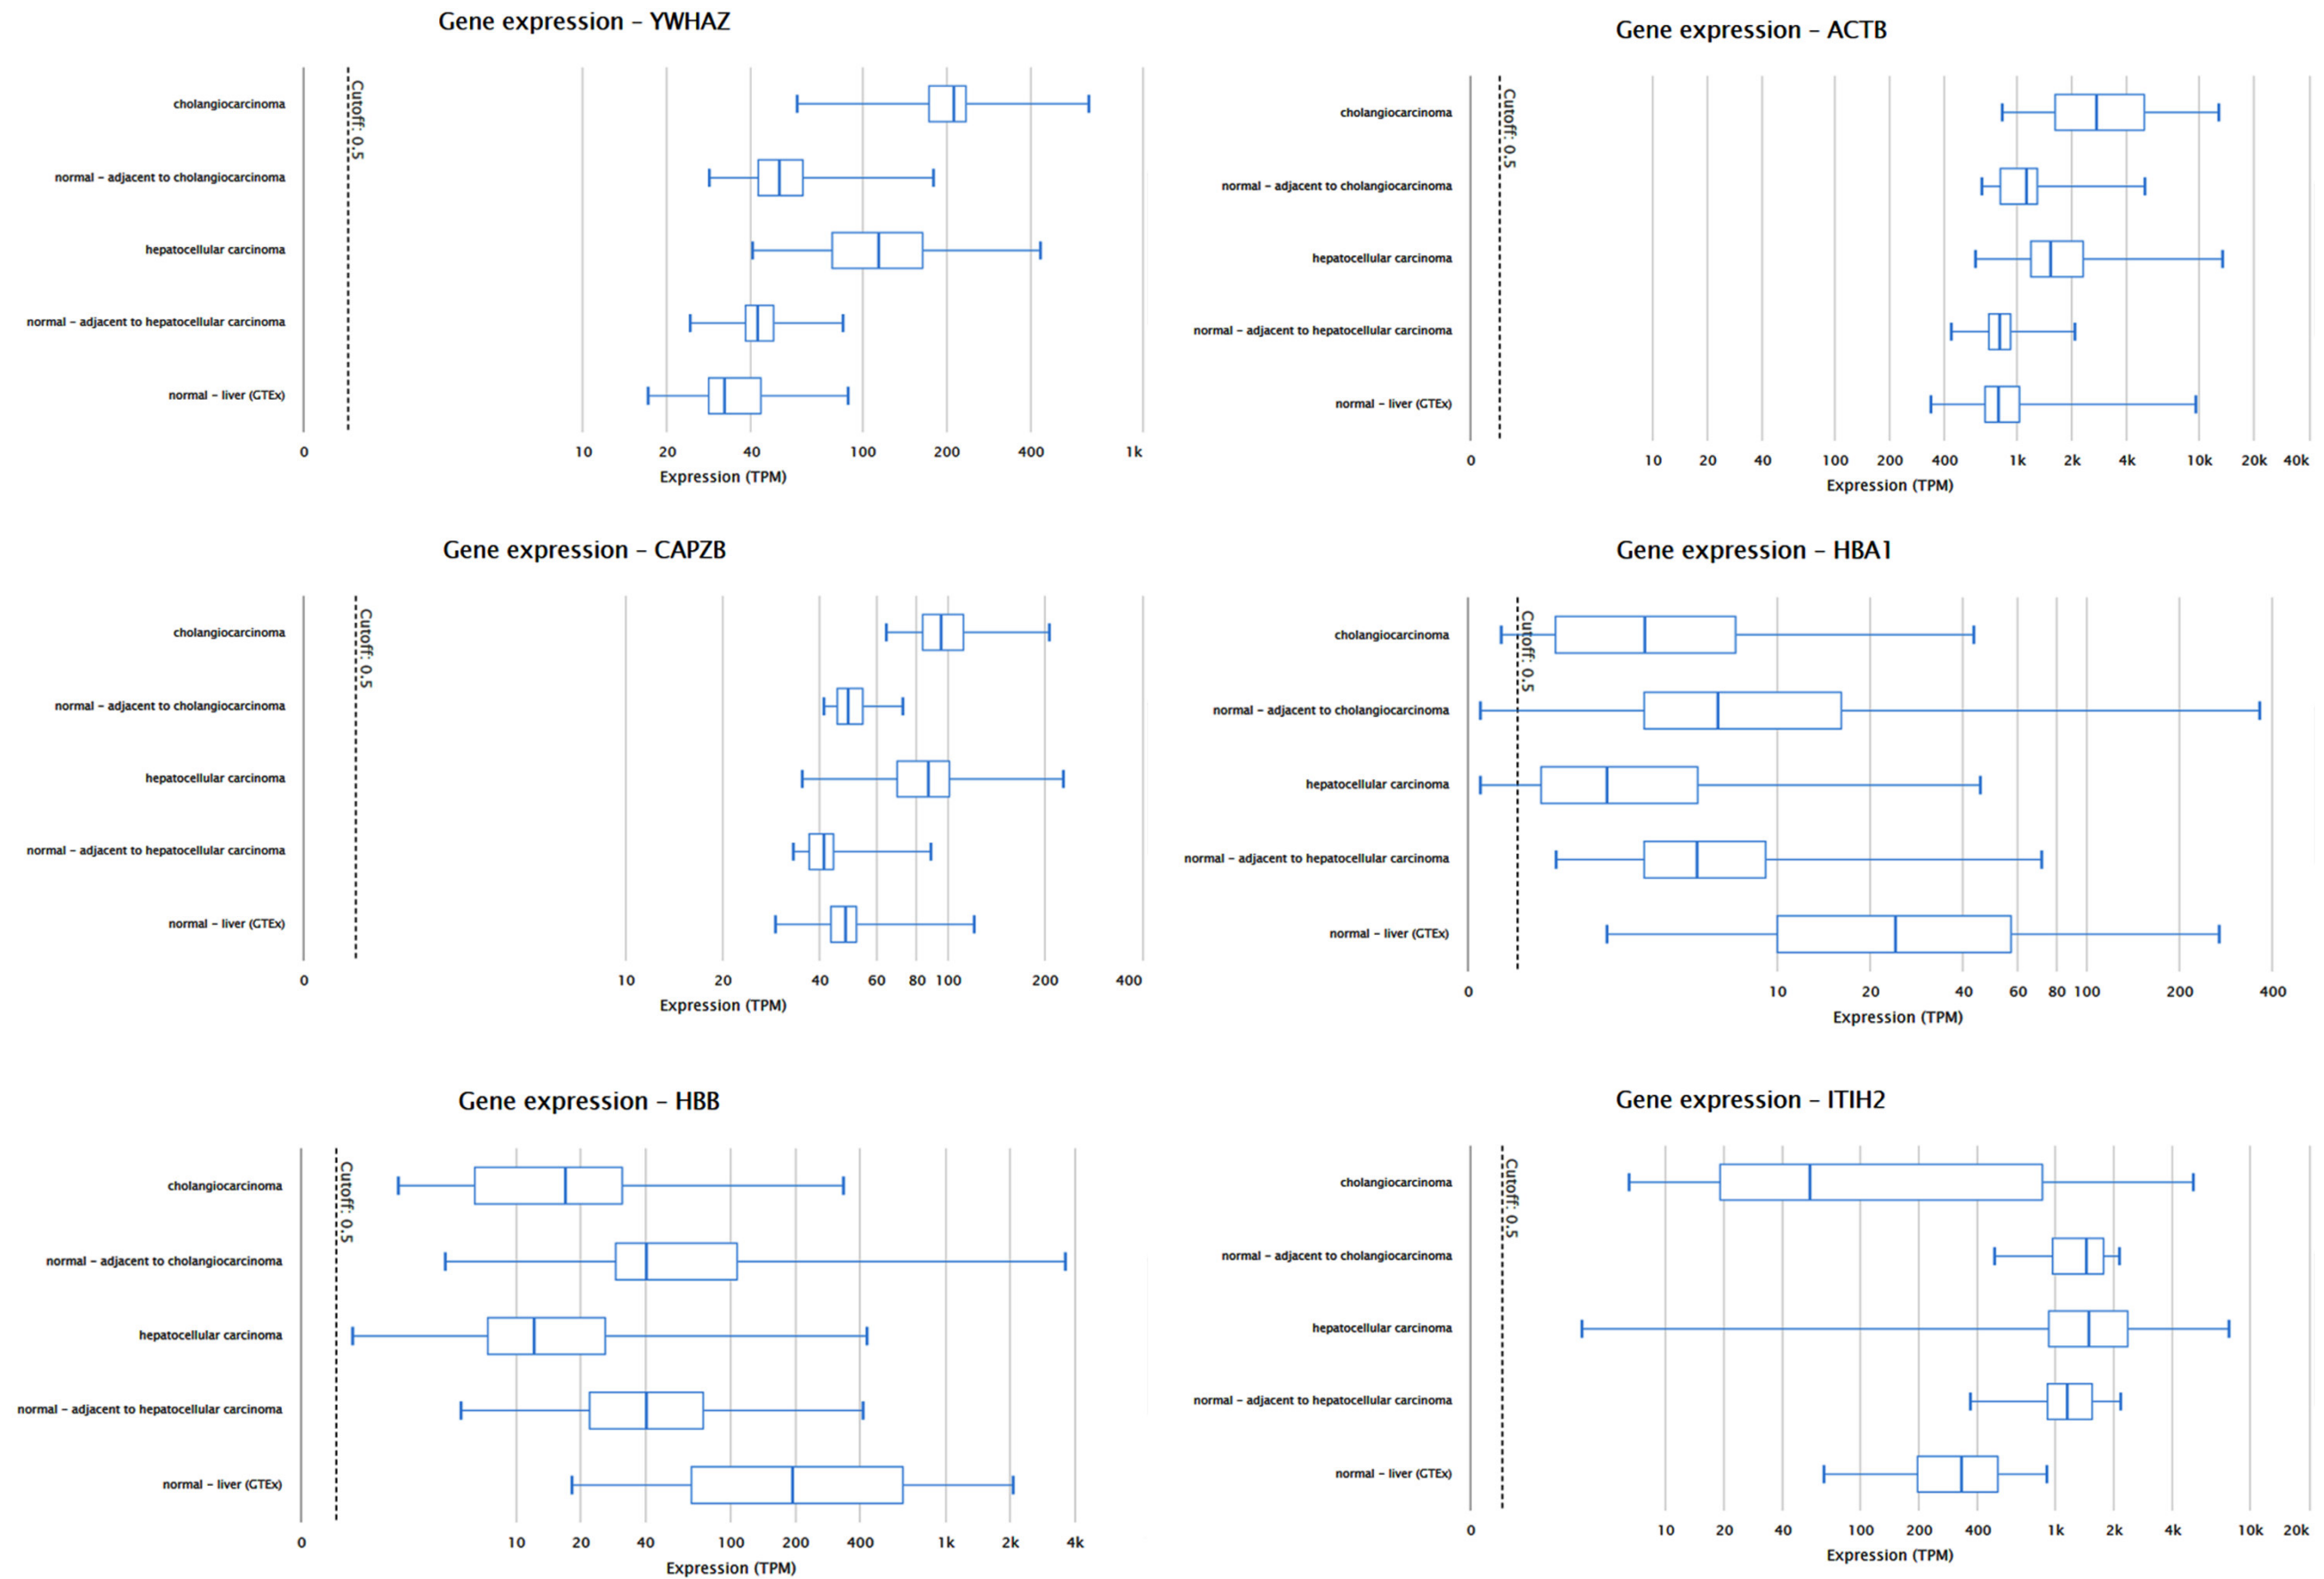

Gene expression - ITIH4

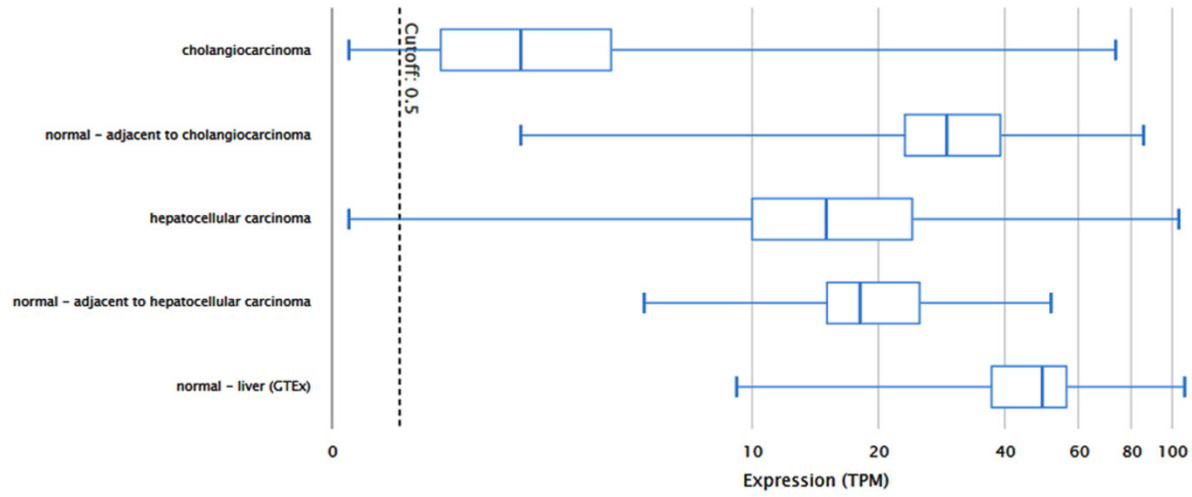

Gene expression - KRT19

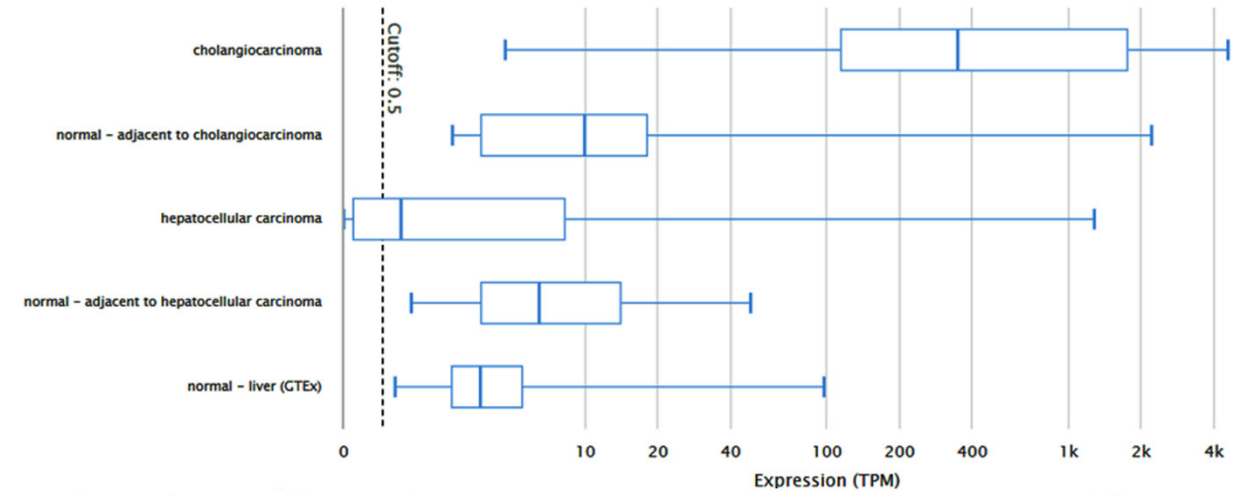

Gene expression - KRT8

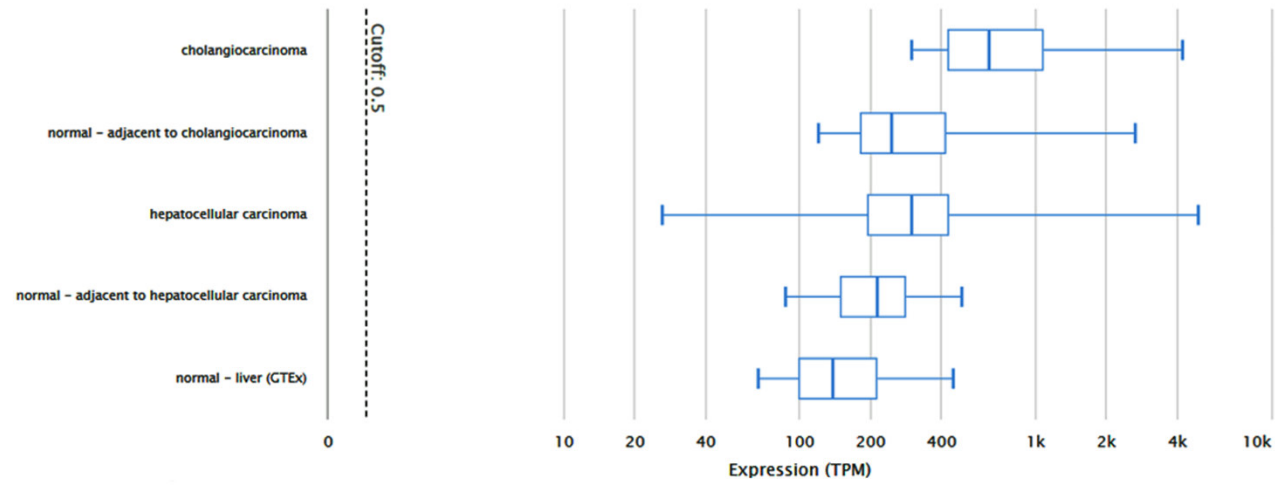

Gene expression - ALB

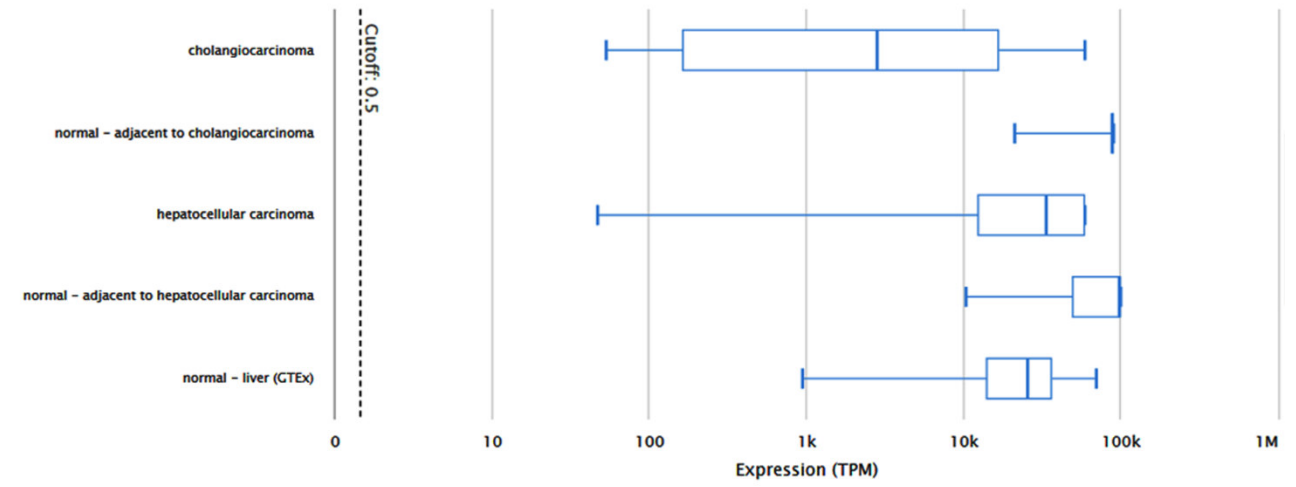

Gene expression - KNG1

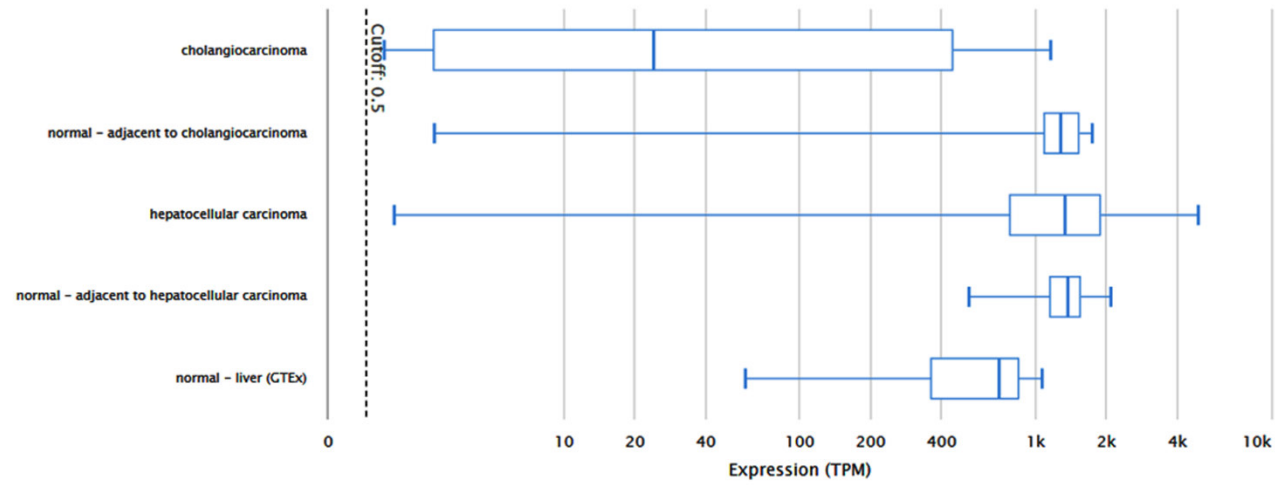

Gene expression - CD99L2

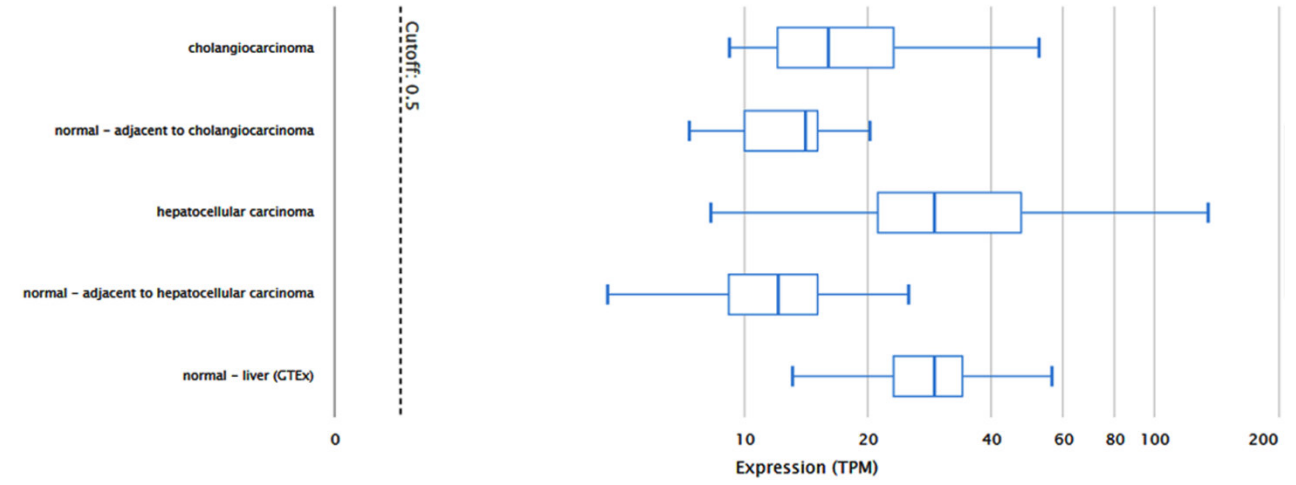

Gene expression - COL1A1

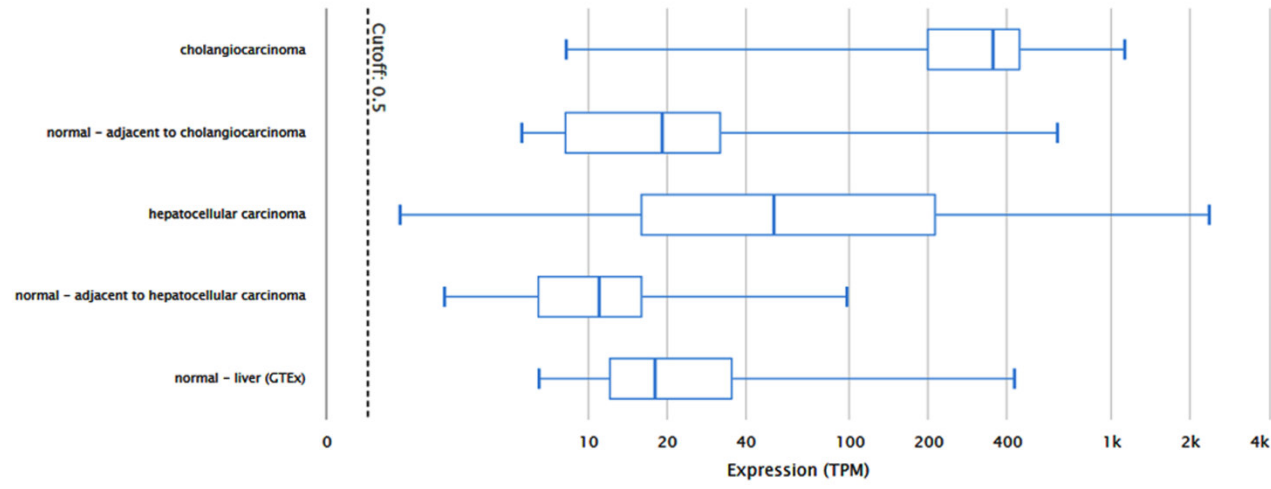

Gene expression - FXD2

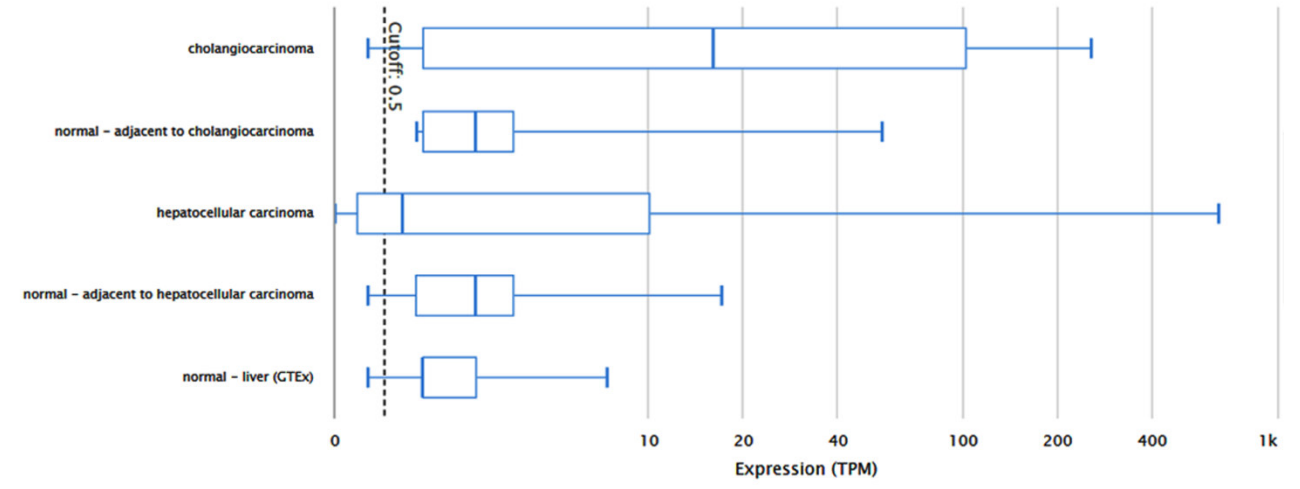

Gene expression - PGRMC1

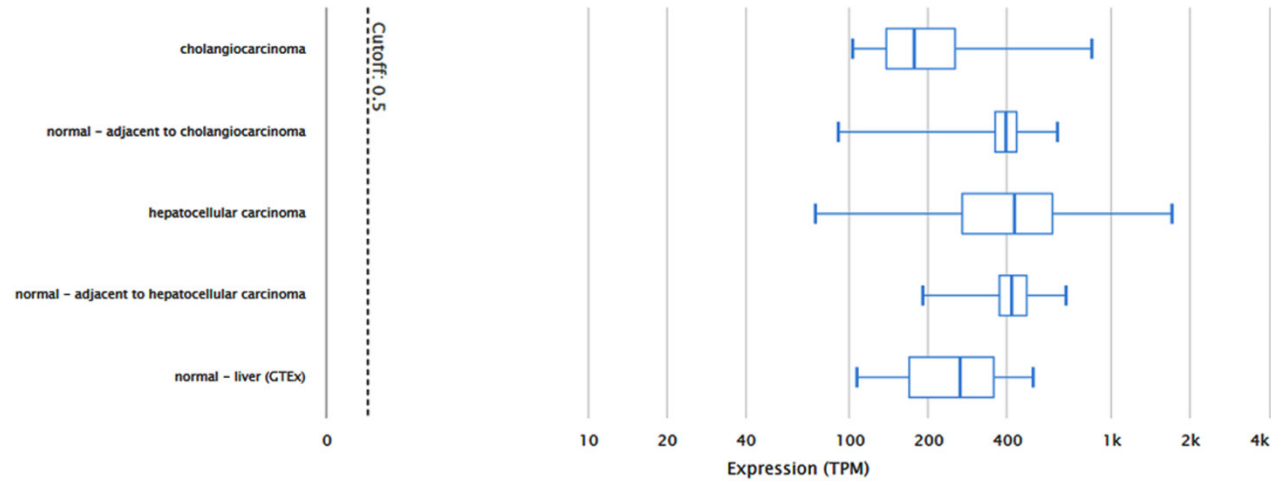

Gene expression - COL3A1

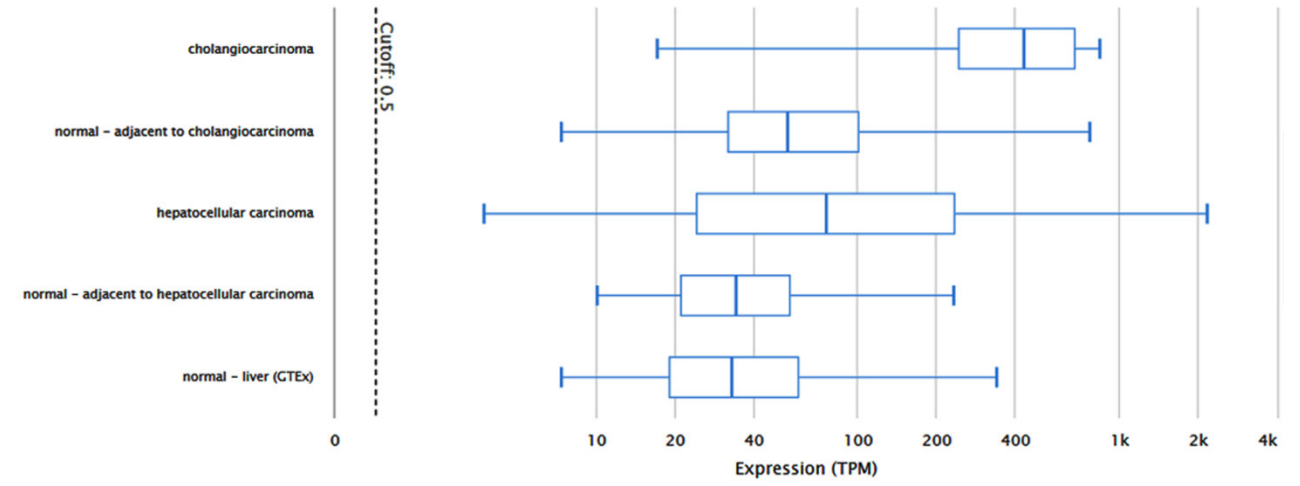

Gene expression - COL1A2

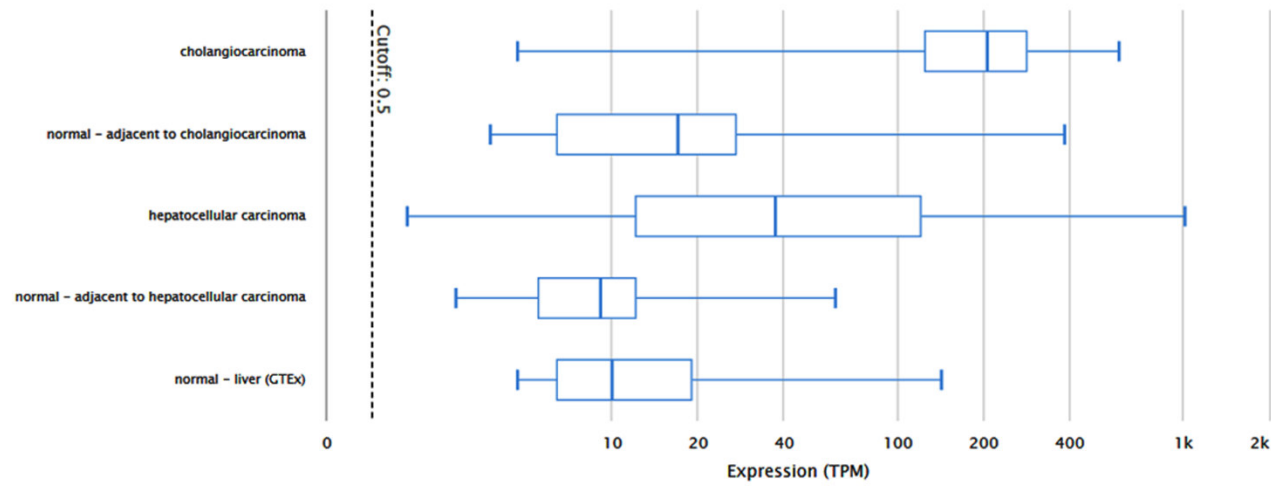

Gene expression - SERPINA1

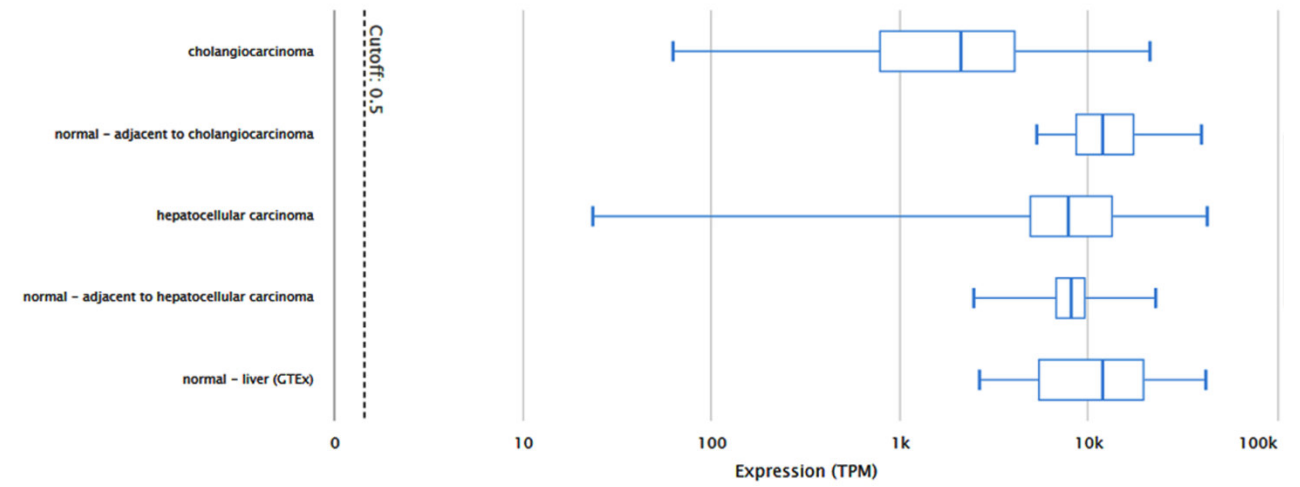

Gene expression - COL17A1

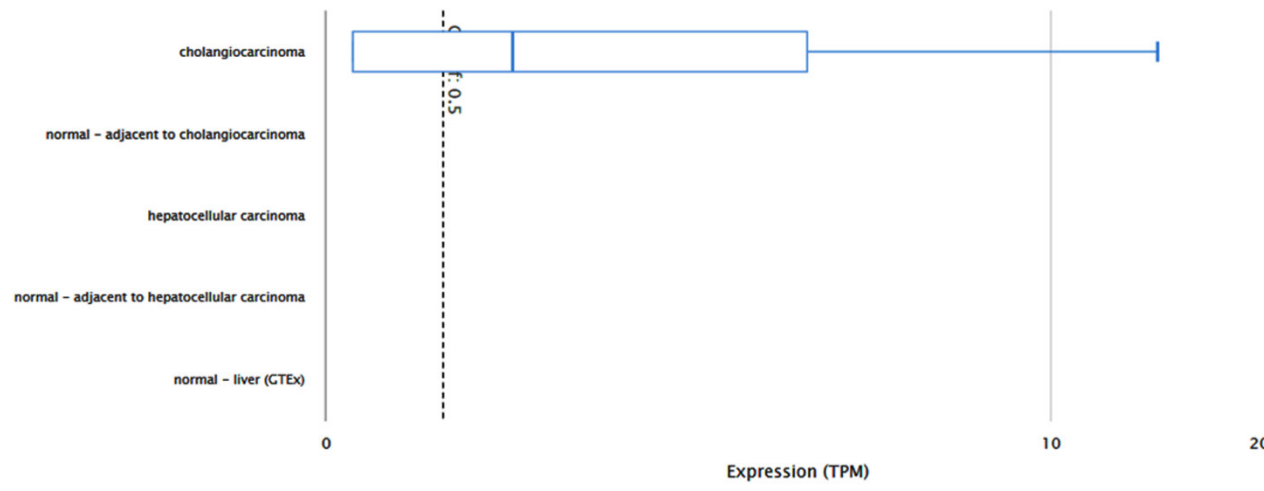

Gene expression - COL5A2

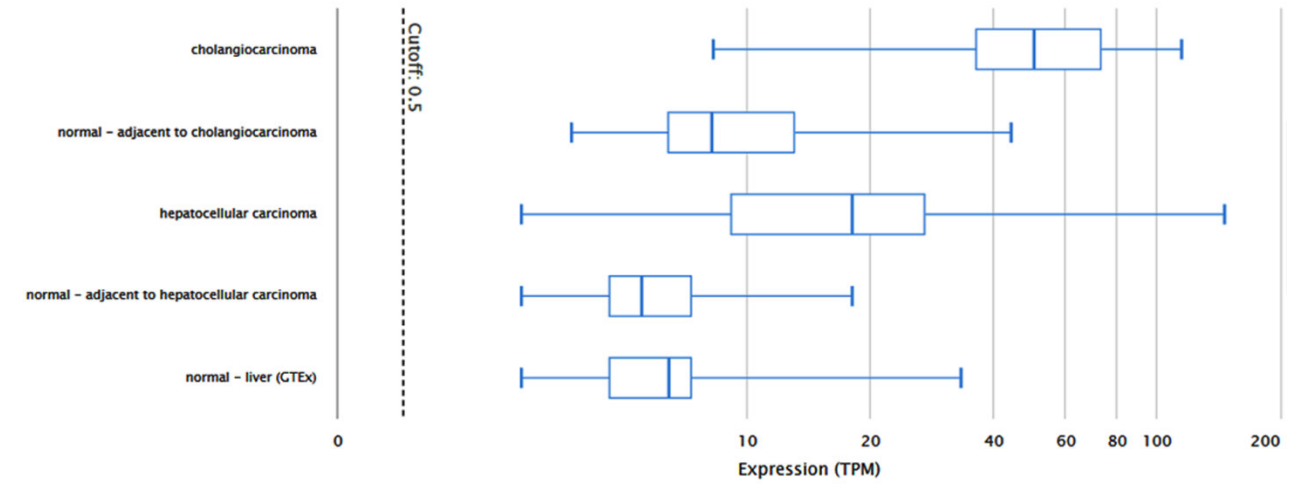

Gene expression - CD99

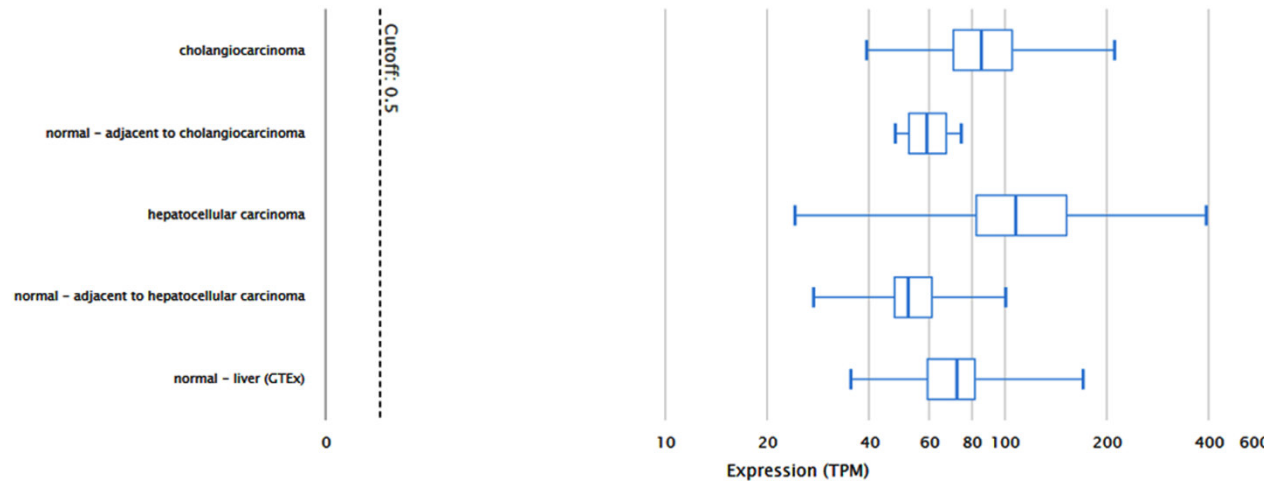

Gene expression - SPP1

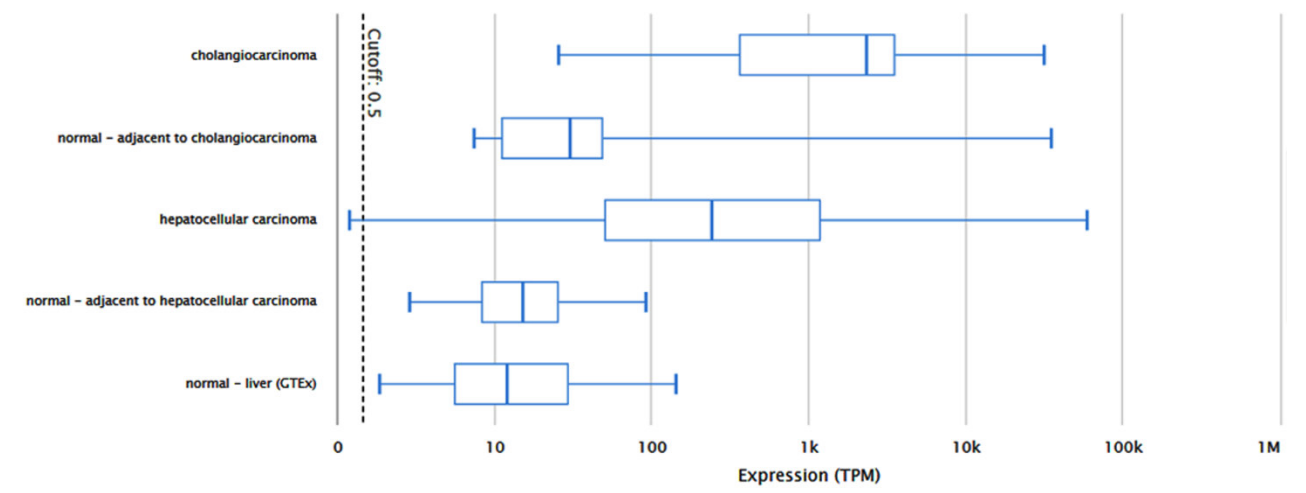

Gene expression - ADAMTS4

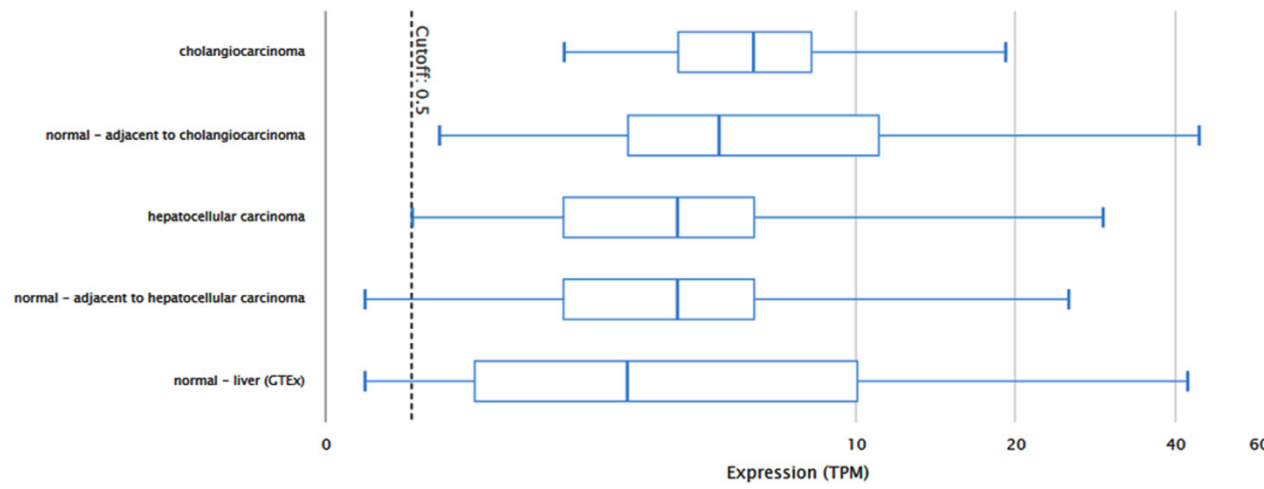

Gene expression - CASP1

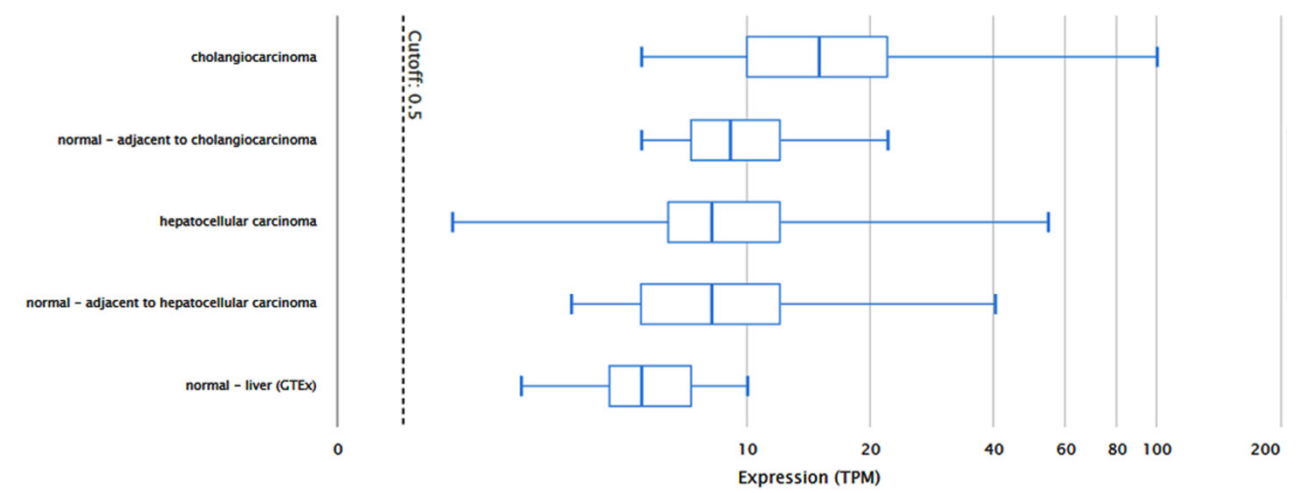

**Table S4.** Physiological and cancer-specific pathological implications of the parental proteins from which the bile peptide markers for CCA diagnosis by bile proteome analysis are derived.

| Protein                                                  | Characteristic physiological functions*                                                                                                                      | Link to cancer pathology                                                                                                                                                                                | Relation to CCA pathology                                                                                                                                                                                                          | Peptide marker                                                                                                                                                                 | Peptide marker specific information                                                                                                                                                                                                                                                                                                                                                                                         |
|----------------------------------------------------------|--------------------------------------------------------------------------------------------------------------------------------------------------------------|---------------------------------------------------------------------------------------------------------------------------------------------------------------------------------------------------------|------------------------------------------------------------------------------------------------------------------------------------------------------------------------------------------------------------------------------------|--------------------------------------------------------------------------------------------------------------------------------------------------------------------------------|-----------------------------------------------------------------------------------------------------------------------------------------------------------------------------------------------------------------------------------------------------------------------------------------------------------------------------------------------------------------------------------------------------------------------------|
| 14-3-3 $\zeta/\delta$ (YWHAZ)                            | Cell survival [1], autophagy [2], cell stress protection [2, 3].                                                                                             | EMT induction [4], tumor cell proliferation [5], chemoresistance [6].                                                                                                                                   | Mediator of EMT, metastasis and invasion [4], prognostic marker for intrahepatic CCA [7], target for chemosensitivity enhancement [8].                                                                                             | 28-SVTEQGAELSNEER-41                                                                                                                                                           | Release by trypsin 1 cleavage [9], Identification in urine during allograft kidney injury [10], epitope for HLA-A MHC I receptors in rats [11], inhibition of T cell migration [12].                                                                                                                                                                                                                                        |
| Actin, cytoplasmic 1 (ACTB)                              | Cellular structure and cell motility [13], gene expression, cell division and proliferation [14].                                                            | Actin cytoskeleton reorganization during EMT [15], NO formation and platelet signaling [16].                                                                                                            | Secreted by the CCA cell line huCCA-1 [17].                                                                                                                                                                                        | 92-NELRVAPEEHPV-103<br>179-DLAGRDLTDYm-190                                                                                                                                     | Elevation of 92-NELRVAPEEHPV-103 in lung lavage fluid during bronchiolitis obliterans syndrome [18].                                                                                                                                                                                                                                                                                                                        |
| F-actin-capping protein subunit $\beta$ (CAPZB)          | Actin filament depolymerization and capping promoting cell motility [19].                                                                                    | Overexpression in tissue specimens of epithelioid sarcoma and association with cell growth and motility [20].                                                                                           | Upregulated in the membrane and cytosole of the human CCA cell line huCCA-1 [21].                                                                                                                                                  | 76-SNKYDPPLEDGAMPS-90                                                                                                                                                          | Elevated in lung lavage fluid during bronchiolitis obliterans syndrome [18].                                                                                                                                                                                                                                                                                                                                                |
| Hemoglobin subunit $\alpha$ and $\beta$ (HBA1 and HBB)   | Oxygen transport, heme binding, control of acid-base equilibrium                                                                                             | Peroxidase activity during inflammation and oxidative stress, and induction of cytotoxicity to macrophages by hemoglobin aggregate formation [22], hemoglobin release by cancer induced hemolysis [23]. | Not systematically investigated, anemia is associated with CCA                                                                                                                                                                     | <b>HBA1:</b><br>27-AEALERmFL-35<br>33-MFLSFPTTK-41<br>63-VADALTNAVAHVDDMPNALSALSDLHAH-90<br><b>HBB:</b><br>2-VHLTPEEKSAVTA-14<br>43-FESFGDLSTPDAVmGNPK-60<br>67-KVLGAFSDGLA-77 | Identification of 33-MFLSFPTTK-41 and 63-VADALTNAVAHVDDMPNALSALSDLHAH-90 as components of circulating exosomes in lung cancer [24], identification of 33-MFLSFPTTK-41 and 43-FESFGDLSTPDAVmGNPK-60 as injury marker in urine after kidney allograft transplantation [10], elevation of 2-VHLTPEEKSAVTA-14, 27-AEALERmFL-35 and 43-FESFGDLSTPDAVmGNPK-60 in lung lavage fluid during bronchiolitis obliterans syndrome [18]. |
| Inter- $\alpha$ -trypsin inhibitor heavy chain H2 (ITI2) | Plasma protease inhibitor activity [25], hyaluron carrier and binding mediator [26], contribution to extracellular matrix stability [27].                    | Tumor invasion and metastasis suppressor with loss of expression in invasive tumors [25, 28].                                                                                                           | Reduced serum levels in CCA compared to benign biliary tract diseased patients [29].                                                                                                                                               | 628-LVIENEAGDER-638                                                                                                                                                            | ----                                                                                                                                                                                                                                                                                                                                                                                                                        |
| Inter- $\alpha$ -trypsin inhibitor heavy chain H4 (ITI4) | Anti-inflammatory type II acute phase protein [30], formation of hyaluronan complexes [31], potentially involved in liver development and regeneration [32]. | Prevention of tumor metastasis [33].                                                                                                                                                                    | Upregulated in bile of malignant (CCA and pancreatic cancer) towards benign (mostly PSC) strictures [34].                                                                                                                          | 381-ILLTDGDPTVGETNPR-396                                                                                                                                                       | Elevated in saliva of oral cancer patients [35].                                                                                                                                                                                                                                                                                                                                                                            |
| Keratin, type I cytoskeletal 19 (KRT19)                  | Cytoskeletal component in epithelial cells [36], actin cytoskeletal organization [37].                                                                       | Histology marker for adenocarcinomas and squamous cell carcinomas [38, 39].                                                                                                                             | Differentiation marker for CCA (KRT19 <sup>+</sup> ) and HCC (KRT19 <sup>-</sup> ) [40], KRT19 fragment CYFRA21-1 is a prognostic marker for intrahepatic CCA [41], reduced expression of KRT19 on CCA cell lines during EMT [42]. | 139-DKILGATIENS-149                                                                                                                                                            | ----                                                                                                                                                                                                                                                                                                                                                                                                                        |



| Protein                                | Characteristic physiological functions*                                                                                                   | Link to cancer pathology                                                                                                                                                                                                   | Relation to CCA pathology                                                                                                                         | Peptide marker                                   | Peptide marker specific information                                                                                                         |
|----------------------------------------|-------------------------------------------------------------------------------------------------------------------------------------------|----------------------------------------------------------------------------------------------------------------------------------------------------------------------------------------------------------------------------|---------------------------------------------------------------------------------------------------------------------------------------------------|--------------------------------------------------|---------------------------------------------------------------------------------------------------------------------------------------------|
| Keratin, type II cytoskeletal 8 (KRT8) | Cytoskeletal component in epithelial cells [43, 44], hepatobiliary epithelial marker with strongest expression in mature polarized cells. | Marker for epithelial tumors [45], reduced expression during EMT [46].                                                                                                                                                     | Secreted by the CCA cell line huCCA-1 [17], reduced expression in a sarcomatoid CCA cell line [47].                                               | 149-RQLETLGQEK-158<br>466-IETRDGKLVSESSDVLPK-483 | Identification of 149-RQLETLGQEK-158 in the human fetal liver proteome [48].                                                                |
| Serum albumin (ALB)                    | Maintenance of oncotic pressure, transport of metabolites, antioxidant.                                                                   | Immune modulation due to binding of pathogen and danger associated molecules and inflammatory mediators [49], evidence for intracellular blocking of inflammatory signaling pathways after endocytic internalization [50]. | Reduced levels in intrahepatic CCA tumor tissue samples [51], levels > 3 g/dL are an independent predictor of overall survival in hilar CCA [52]. | 173-FYAPPELLFAK-183                              | Component of circulating exosomes in lung cancer <sup>[24]</sup> , identification in urine during allograft kidney injury <sup>[10]</sup> . |

\* According to the Uniprot knowledge database unless no other reference is given

Abbreviations: CCA, cholangiocarcinoma; EMT, epithelial–mesenchymal transition; HCC, hepatocellular carcinoma.

**Table S5.** Physiological and cancer-specific pathological implications of the parental proteins from which the urine peptide markers for CCA diagnosis by urine proteome analysis are derived.

| Protein                              | Characteristic physiological functions*                                                                                                                                                                                                                                           | Link to cancer pathology                                                                                                                                                                         | Relation to CCA pathology                                                | Peptide marker    | Peptide marker specific information                                                                                            |
|--------------------------------------|-----------------------------------------------------------------------------------------------------------------------------------------------------------------------------------------------------------------------------------------------------------------------------------|--------------------------------------------------------------------------------------------------------------------------------------------------------------------------------------------------|--------------------------------------------------------------------------|-------------------|--------------------------------------------------------------------------------------------------------------------------------|
| Uromodulin (UMOD)                    | Salt and water retention, urinary host defense and protection against stone formation in the kidney [53], renal clearance of circulating cytokines [54], regulation of granulopoiesis via proximal epithelial activation of the IL-23/IL-17 axis [55].                            | Protection from kidney injury by inhibition of inflammation [56], immunomodulation of blood cells [57], expression under control of the cancer-associated transcriptional factor HNF1B [58, 59]. | -----                                                                    | 589-SGSVIDQSR-597 | Identification in human urine [60], differential urinary expression between muscle-invasive bladder cancer versus normal [61]. |
| Kininogen-1 (KNG1)                   | Thiol protease inhibition [62], inhibition of endothelial cell proliferation and migration, angiogenesis and apoptosis [63], precursor of proinflammatory vasodilator kinins [64].                                                                                                | Serum biomarker for advanced colorectal adenoma and colorectal cancer [65].                                                                                                                      | Increased biliary expression in malignant versus benign strictures [34]. | 62-ATKTVGSDTF-71  | Differential urinary expression during inflammatory bowel disease [66], cystic kidney disease [67] and heart failure [68].     |
| CD99 antigen-like protein 2 (CD99L2) | Cell surface protein mediating intercellular adhesion and leukocyte extravasation through the endothelial basement membrane [69], enhanced surface expression by interaction with CD99 [70], Integrin $\beta$ 1-mediated downregulation inhibiting leukocyte transmigration [71]. | Marker of a mesenchymal phenotype during EMT [72].                                                                                                                                               | -----                                                                    | 26-DFDDFNLED-34   | Identification in human urine [73], decreased urinary levels in cystic kidney disease [67].                                    |

| Protein                                 | Characteristic physiological functions*                                                                                                                                                    | Link to cancer pathology                                                                                       | Relation to CCA pathology                                                                                                                                                    | Peptide marker                                                                                                                                                                                                                                                                                           | Peptide marker specific information                                                                                                                                                                                                                                                                                                                                                               |
|-----------------------------------------|--------------------------------------------------------------------------------------------------------------------------------------------------------------------------------------------|----------------------------------------------------------------------------------------------------------------|------------------------------------------------------------------------------------------------------------------------------------------------------------------------------|----------------------------------------------------------------------------------------------------------------------------------------------------------------------------------------------------------------------------------------------------------------------------------------------------------|---------------------------------------------------------------------------------------------------------------------------------------------------------------------------------------------------------------------------------------------------------------------------------------------------------------------------------------------------------------------------------------------------|
| Collagen $\alpha$ -1(I)<br>(COL1A1)     | Structural component of the extracellular matrix generated mainly from fibroblasts, binding of platelet-derived growth factor (PDGF) which is a potent mitogen for mesenchymal cells [74]. | Overexpression in various cancer types promoting metastasis [75] and apoptosis inhibition in tumor cells [76]. | Indicative for the presence of cancer-associated fibroblasts in the CCA tumor stroma [77]                                                                                    | 222-PpGpGKNGDDGEAGKP-238<br>288-EpGSpGENGApGQMGPR-304<br>543-SpGSPGPDGKTGPpGPAG-560<br>550-DGKTGpPGPAGQDGRPGpGppG-572<br>613-DGEAGAQGPpGPA-625<br>657-KpGEQGVpGDLG-668<br>780-DKGESGpSGpAGpTGARGApGDRGEpGppG-809<br>918-RpGEVGPpGPPGP-930<br>1007-GPpGESGREGApG-1019<br>1021-EGSpGRDGSgGAKGDRGETGPA-1042 | Differential urinary expression in chronic kidney [67, 78, 79], cardiovascular [68] and chronic inflammatory [66] diseases.                                                                                                                                                                                                                                                                       |
| Collagen $\alpha$ -1(II)<br>(COL2A1)    | Main structural component of cartilaginous tissues [80], PDGF binding [74], proteoglycan binding [81].                                                                                     | Increased expression indicates tumor recurrence in high-grade serous ovarian cancer [82].                      | Among the genes that are associated with lymph node metastasis and perineural invasion of CCA [83].                                                                          | 1212-PGNPpGPPGPPGpGpGIDmSAFAG-1225                                                                                                                                                                                                                                                                       | -----                                                                                                                                                                                                                                                                                                                                                                                             |
| Collagen $\alpha$ -1(III)<br>(COL3A1)   | Main structural component of reticular fibers in soft tissues such as liver along with type I collagen [84], binding to platelets [85].                                                    | Increased expression in bladder cancer with association to poor prognosis and focal adhesion [86].             | Indicative for the presence of cancer-associated fibroblasts in the CCA tumor stroma [77].                                                                                   | 1084-ApGPQGPpRGDkGETGERG-1101                                                                                                                                                                                                                                                                            | Differential urinary expression during rheumatoid arthritis [66].                                                                                                                                                                                                                                                                                                                                 |
| Collagen $\alpha$ -2(I)<br>(COL1A2)     | Extracellular matrix structural component, PDGF binding [74].                                                                                                                              | Increased expression and prognostic marker in gastric cancer [87].                                             | Altered lysine hydroxylation in a <i>Pten</i> <sup>-/-</sup> mouse model representing a mixed phenotype of HCC and CCA with impact on matrix remodeling and stiffening [88]. | 136-GPpGKAGEDGHpGKpGRpGERG-157<br>188-LkGQpGApGVKGEpGApGENGTpGQTGARG-217<br>188-LkGQpGApGVKGEpGApGENGTpGQTGARG-217<br>189-kGQpGApGVKGEpGApGENGTpGQTGARG-217                                                                                                                                              | Increased urinary levels of 136-GPpGKAGEDGHpGKpGRpGERG-157, 188-LkGQpGApGVKGEpGApGENGTpGQTGARG-217 and 189-kGQpGApGVKGEpGApGENGTpGQTGARG-217 in lupus nephritis [79], differential expression of 136-GPpGKAGEDGHpGKpGRpGERG-157 in muscle-invasive bladder cancer [61], differential expression of 188-LkGQpGApGVKGEpGApGENGTpGQTGARG-217 in chronic kidney disease versus healthy controls [89]. |
| Collagen $\alpha$ -2(V)<br>(COL5A2)     | Key determinant in the assembly of tissue matrices with binding affinity to DNA, heparan sulfate, thrombospondin, heparin, and insulin.                                                    | Increased expression in muscle-invasive bladder cancer associated with poor prognosis and tumor invasion [90]. | -----                                                                                                                                                                        | 833-PGSRGENGPTGAVGFAGPQGPDPGQpGVKGEp-863                                                                                                                                                                                                                                                                 | Differential urinary expression during rheumatoid arthritis [66].                                                                                                                                                                                                                                                                                                                                 |
| Collagen $\alpha$ -6(VI)<br>(COL6A6)    | Component of the basal lamina of epithelial cells potentially involved in the regulation of epithelial cell-fibronectin interactions [91].                                                 | Correlation of high tissue expression levels with early tumor stages in breast cancer [92].                    | Upregulation in a <i>Pten</i> <sup>-/-</sup> mouse model representing a mixed phenotype of HCC and CCA [88].                                                                 | 1701-GLpGEmGSpGEPG-1713                                                                                                                                                                                                                                                                                  | -----                                                                                                                                                                                                                                                                                                                                                                                             |
| Collagen $\alpha$ -1(XVII)<br>(COL17A1) | Structural component of hemidesmosomes mediating adhesion of keratinocytes to the underlying epidermal basement membrane [93].                                                             | Overexpression in epithelial cancers due to aberrant epigenetic control promoting tumor invasion [94].         | Elevated mRNA expression in cholangiocarcinoma tissue [95].                                                                                                                  | 599-PGpQGpKQKGSVGDpGMEGpMQRGREG-627<br>628-PMGpRGEAGpGSGEKGERGAAGEPGp-654                                                                                                                                                                                                                                | -----                                                                                                                                                                                                                                                                                                                                                                                             |

| Protein                                                         | Characteristic physiological functions*                                                                                                                                                                                                                       | Link to cancer pathology                                                                                                                                                                                                                       | Relation to CCA pathology                                                                                                                                                                                                                                                       | Peptide marker                                | Peptide marker specific information                                                                                                                                                                                                                |
|-----------------------------------------------------------------|---------------------------------------------------------------------------------------------------------------------------------------------------------------------------------------------------------------------------------------------------------------|------------------------------------------------------------------------------------------------------------------------------------------------------------------------------------------------------------------------------------------------|---------------------------------------------------------------------------------------------------------------------------------------------------------------------------------------------------------------------------------------------------------------------------------|-----------------------------------------------|----------------------------------------------------------------------------------------------------------------------------------------------------------------------------------------------------------------------------------------------------|
| Na <sup>+</sup> /K <sup>+</sup> -ATPase $\gamma$ subunit (FXD2) | Modulation of sodium ATPase activity [96].                                                                                                                                                                                                                    | Increased expression in ovarian clear cell carcinoma under control of the transcriptional factor HNF1B [97].                                                                                                                                   | Differential expression in CCA cells [98].                                                                                                                                                                                                                                      | 3-GLSMDGGGSPKGDVDP-18                         | Reduced urinary expression in chronic kidney disease [89] and overt heart failure [99].                                                                                                                                                            |
| Membrane-associated progesterone receptor component 1 (PGRMC1)  | Component of a progesterone-binding membrane complex [100], progesterone binding [101], many other cellular functions like heme and cytochrome P450 binding, autophagy and apoptosis induction [100].                                                         | Regulation of cancer proliferation by EGF receptor and cytochrome P450 interaction [102], differential cell surface expression in various tumors like breast and bladder cancer [103, 104], negative regulation of hepatocarcinogenesis [105]. | ---                                                                                                                                                                                                                                                                             | 54-SGDSDDDEPPPLPRL-68                         | Reduced urinary expression in chronic kidney disease [89], cardiovascular disease [106], inflammatory bowel disease [66] and muscle-invasive bladder cancer [107].                                                                                 |
| $\alpha$ -1-antitrypsin (SERPINA1)                              | Acute phase protein with anti-inflammatory and immunoregulatory functions [108], serine protease inhibition including neutrophil elastase, plasmin, thrombin, kallikreins, matipase, caspase-3 [109], induction of IL-1 receptor antagonist expression [110]. | Association of $\alpha$ -1-antitrypsin deficiency with increased risk of liver cirrhosis and hepatocellular carcinoma [111], lung disease [112] and ANCA-associated vasculitis [113].                                                          | Increased serum levels as marker for early CCA diagnosis [114], increased oxidation due to oxidative stress in CCA [115].                                                                                                                                                       | 25-EDPQGDAAQKTDTSHTDQDHP-45                   | Reduced urinary expression during preclinical cardiac dysfunction before heart failure [68], increase in urinary expression by inhibition of the sodium/glucose cotransporter 2 with empagliflozin in patients with diabetic kidney disease [116]. |
| Interleukin-1 receptor accessory protein-like 1 (IL1RAPL1)      | Member of the TOLL/IL-1 receptor family [117], IL-38 binding [118], negative regulation of calcium-dependent exocytosis [119], evidence for selective activation of JNK [120], identification in exosomes of mesenchymal stem cells [121].                    | Upregulation upon $\gamma\delta$ T cell activation [122], inhibition of cytokine release by macrophages upon antagonizing IL-38 binding [118].                                                                                                 | Predicted as target for miR-10a-5p upregulation in human CCA cell lines [123].                                                                                                                                                                                                  | 74-LMWWKSSGPGDFEPIAFDGSRMKEED-101             | ---                                                                                                                                                                                                                                                |
| CD99 antigen (CD99)                                             | Cell surface protein involved in cell migration, adhesion, diapedesis, death and differentiation of leukocytes [69, 124], inhibition of cell-ECM adhesion by integrin 1- $\beta$ suppression [125].                                                           | Cancer type specific marker for neuroectodermal and non-small cell lung carcinomas [126, 127], increased expression in inflammatory diseases [128].                                                                                            | Decreased expression in gastric and gallbladder carcinomas due to promoter methylation, loss of heterozygosity and transcription factor down-regulation associated with unfavorable prognosis [129, 130].                                                                       | 97-DGVSGGEGKGGSDGGGSHRKEEADAPGVIPGIVG-132     | Differential expression in urine between muscle-invasive bladder cancer versus normal [61].                                                                                                                                                        |
| Osteopontin (SPP1)                                              | Bone mineralisation [131], matricellular ECM component [132], CD44-dependent chemotaxis [133], mediation of type 1 immunity [134].                                                                                                                            | Overexpression in various cancer types with protumorigenic and premetastatic activity [135], contribution to scarring and liver fibrosis via TGF- $\beta$ [136], immune checkpoint by CD44 binding promoting tumor invasion [137, 138].        | Elevated serum levels in patients with CCA compared to healthy controls and patients with PSC [139], association of elevated serum levels with shorter overall survival and high probability of tumor relapse after curative resection in patients with intrahepatic CCA [140]. | 194-ESEELNGAYKAIPVAQDLNAPSDWDSRGKDSYETSQL-230 | -----                                                                                                                                                                                                                                              |

\* According to the Uniprot knowledge database unless no other reference is given

Abbreviations: CCA; cholangiocarcinoma; EMT; epithelial–mesenchymal transition; HCC, hepatocellular carcinoma.

## Supplementary references – Literature review

1. Liang R, Chen XQ, Bai QX, Wang Z, Zhang T, Yang L, et al. Increased 14-3-3 $\zeta$  expression in the multidrug-resistant leukemia cell line HL-60/VCR as compared to the parental line mediates cell growth and apoptosis in part through modification of gene expression. *Acta Haematol.* 2014;132:177-86.
2. Weerasekara VK, Panek DJ, Broadbent DG, Mortenson JB, Mathis AD, Logan GN, et al. Metabolic-stress-induced rearrangement of the 14-3-3 $\zeta$  interactome promotes autophagy via a ULK1- and AMPK-regulated 14-3-3 $\zeta$  interaction with phosphorylated Atg9. *Mol Cell Biol.* 2014;34:4379-88.
3. Tang Y, Liu S, Li N, Guo W, Shi J, Yu H, et al. 14-3-3 $\zeta$  promotes hepatocellular carcinoma venous metastasis by modulating hypoxia-inducible factor-1 $\alpha$ . *Oncotarget.* 2016;7:15854-67.
4. Yang Y, Liu Y, He JC, Wang JM, Schemmer P, Ma CQ, et al. 14-3-3 $\zeta$  and aPKC- $\iota$  synergistically facilitate epithelial-mesenchymal transition of cholangiocarcinoma via GSK-3 $\beta$ /Snail signaling pathway. *Oncotarget.* 2016;7:55191-210.
5. Nishimura Y, Komatsu S, Ichikawa D, Nagata H, Hirajima S, Takeshita H, et al. Overexpression of YWHAZ relates to tumor cell proliferation and malignant outcome of gastric carcinoma. *Br J Cancer.* 2013;108:1324-31.
6. Matta A, Siu KW, Ralhan R. 14-3-3 zeta as novel molecular target for cancer therapy. *Expert Opin Ther Targets.* 2012;16:515-23.
7. Zhang C, Liu LX, Dong ZR, Shi GM, Cai JB, Zhang PF, et al. Up-regulation of 14-3-3 $\zeta$  expression in intrahepatic cholangiocarcinoma and its clinical implications. *Tumour Biol.* 2015;36:1781-9.
8. Kittirat Y, Techasen A, Thongchot S, Loilome W, Thanan R, Yongvanit P, et al. Suppression of 14-3-3 $\zeta$  in cholangiocarcinoma cells inhibits proliferation through attenuated Akt activity, enhancing chemosensitivity to gemcitabine. *Oncol Lett.* 2018;15:347-53.
9. Schilling O, Overall CM. Proteome-derived, database-searchable peptide libraries for identifying protease cleavage sites. *Nat Biotechnol.* 2008;26:685-94.
10. Sigdel TK, Salomonis N, Nicora CD, Ryu S, He J, Dinh V, et al. The identification of novel potential injury mechanisms and candidate biomarkers in renal allograft rejection by quantitative proteomics. *Mol Cell Proteomics.* 2014;13:621-31.
11. Barnea E, Melamed Kadosh D, Haimovich Y, Satumtira N, Dorris ML, Nguyen MT, et al. The Human Leukocyte Antigen (HLA)-B27 Peptidome in Vivo, in Spondyloarthritis-susceptible HLA-B27 Transgenic Rats and the Effect of Erp1 Deletion. *Mol Cell Proteomics.* 2017;16:642-62.
12. Tripathy D, Clement SC, Schwenke DC, Banerji M, Bray GA, Buchanan TA, et al. Baseline adiponectin levels do not influence the response to pioglitazone in ACT NOW. *Diabetes Care.* 2014;37:1706-11.
13. Drazic A, Aksnes H, Marie M, Boczkowska M, Varland S, Timmerman E, et al. NAA80 is actin's N-terminal acetyltransferase and regulates cytoskeleton assembly and cell motility. *Proc Natl Acad Sci U S A.* 2018;115:4399-404.
14. Cuvertino S, Stuart HM, Chandler KE, Roberts NA, Armstrong R, Bernardini L, et al. ACTB Loss-of-Function Mutations Result in a Pleiotropic Developmental Disorder. *Am J Hum Genet.* 2017;101:1021-33.
15. Boland S, Boisvieux-Ulrich E, Houcine O, Baeza-Squiban A, Pouchelet M, Schoëvaert D, Marano F. TGF beta 1 promotes actin cytoskeleton reorganization and migratory phenotype in epithelial tracheal cells in primary culture. *J Cell Sci.* 1996;109:2207-19.
16. Ji Y, Ferracci G, Warley A, Ward M, Leung KY, Samsuddin S, et al. beta-Actin regulates platelet nitric oxide synthase 3 activity through interaction with heat shock protein 90. *Proc Natl Acad Sci U S A.* 2007;104:8839-44.
17. Srisomsap C, Sawangareetrakul P, Subhasitanont P, Chokchaichamnankit D, Chiablaem K, Bhudhisawasdi V, et al. Proteomic studies of cholangiocarcinoma and hepatocellular carcinoma cell secretomes. *J Biomed Biotechnol.* 2010;2010:437143.
18. Stone MD, Harvey SB, Nelsestuen GL, Reilly C, Hertz MI, Wendt CH. Elevated peptides in lung lavage fluid associated with bronchiolitis obliterans syndrome. *PLoS One.* 2014;9:e84471.
19. Bai SW, Herrera-Abreu MT, Rohn JL, Racine V, Tajadura V, Suryavanshi N, et al. Identification and characterization of a set of conserved and new regulators of cytoskeletal organization, cell morphology and migration. *BMC Biol.* 2011;9:54.
20. Mukaihara K, Suehara Y, Kohsaka S, Kubota D, Toda-Ishii M, Akaike K, et al. Expression of F-actin-capping protein subunit beta, CAPZB, is associated with cell growth and motility in epithelioid sarcoma. *BMC Cancer.* 2016;16:206.
21. Srisomsap C, Subhasitanont P, Sawangareetrakul P, Chokchaichamnankit D, Ngiwsara L, Chiablaem K, Svasti J. Comparison of membrane-associated proteins in human cholangiocarcinoma and hepatocellular carcinoma cell lines. *Proteomics Clin Appl.* 2007;1:89-106.
22. Kapralov A, Vlasova II, Feng W, Maeda A, Walson K, Tyurin VA, et al. Peroxidase activity of hemoglobin-haptoglobin complexes: covalent aggregation and oxidative stress in plasma and macrophages. *J Biol Chem.* 2009;284:30395-407.
23. Altinoz MA, Elmaci I, Ince B, Ozpinar A, Sav AM. Hemoglobins, Hemorphins, and 11p15.5 Chromosomal Region in Cancer Biology and Immunity with Special Emphasis for Brain Tumors. *J Neurol Surg A Cent Eur Neurosurg.* 2016;77:247-57.
24. Ueda K, Ishikawa N, Tatsuguchi A, Saichi N, Fujii R, Nakagawa H. Antibody-coupled monolithic silica microtips for highthroughput molecular profiling of circulating exosomes. *Sci Rep.* 2014;4:6232.
25. Hamm A, Veeck J, Bektas N, Wild PJ, Hartmann A, Heindrichs U, et al. Frequent expression loss of Inter-alpha-trypsin inhibitor heavy chain (ITIH) genes in multiple human solid tumors: a systematic expression analysis. *BMC Cancer.* 2008;8:25.
26. Huang L, Yoneda M, Kimata K. A serum-derived hyaluronan-associated protein (SHAP) is the heavy chain of the inter alpha-trypsin inhibitor. *J Biol Chem.* 1993;268:26725-30.
27. Bost F, Diarra-Mehrpour M, Martin JP. Inter-alpha-trypsin inhibitor proteoglycan family--a group of proteins binding and stabilizing the extracellular matrix. *Eur J Biochem.* 1998;252:339-46.
28. Paris S, Sesboüé R, Delpech B, Chauzy C, Thiberville L, Martin JP, et al. Inhibition of tumor growth and metastatic spreading by overexpression of inter-alpha-trypsin inhibitor family chains. *Int J Cancer.* 2002;97:615-20.
29. Janvilisri T, Leelawat K, Roytrakul S, Paemanee A, Tohtong R. Novel Serum Biomarkers to Differentiate Cholangiocarcinoma from Benign Biliary Tract Diseases Using a Proteomic Approach. *Dis Markers.* 2015;2015:105358.
30. Kashyap RS, Nayak AR, Deshpande PS, Kabra D, Purohit HJ, Taori GM, Daginawala HF. Inter-alpha-trypsin inhibitor heavy chain 4 is a novel marker of acute ischemic stroke. *Clin Chim Acta.* 2009;402:160-3.
31. Ivancic MM, Irving AA, Jonakin KG, Dove WF, Sussman MR. The concentrations of EGFR, LRG1, ITIH4, and F5 in serum correlate with the number of colonic adenomas in ApcPirc/+ rats. *Cancer Prev Res (Phila).* 2014;7:1160-9.
32. Bhanumathy CD, Tang Y, Monga SP, Katuri V, Cox JA, Mishra B, Mishra L. Itih-4, a serine protease inhibitor regulated in interleukin-6-dependent liver formation: role in liver development and regeneration. *Dev Dyn.* 2002;223:59-69.
33. Weidle UH, Birzele F, Tiefenthaler G. Potential of Protein-based Anti-metastatic Therapy with Serpins and Inter  $\alpha$ -Trypsin Inhibitors. *Cancer Genomics Proteomics.* 2018;15:225-38.
34. Navaneethan U, Lourdasamy V, Gk Venkatesh P, Willard B, Sanaka MR, Parsi MA. Bile proteomics for differentiation of malignant from benign biliary strictures: a pilot study. *Gastroenterol Rep (Oxf).* 2015;3:136-43.
35. Xie H, Onsongo G, Popko J, de Jong EP, Cao J, Carlis JV, et al. Proteomics analysis of cells in whole saliva from oral cancer patients via value-added three-dimensional peptide fractionation and tandem mass spectrometry. *Mol Cell Proteomics.* 2008;7:486-98.
36. Moll R, Franke WW, Schiller DL, Geiger B, Krepler R. The catalog of human cytokeratins: patterns of expression in normal epithelia, tumors and cultured cells. *Cell.* 1982;31:11-24.
37. Eckert RL. Sequence of the human 40-kDa keratin reveals an unusual structure with very high sequence identity to the corresponding bovine keratin. *Proc Natl Acad Sci U S A.* 1988;85:1114-8.

38. Jain R, Fischer S, Serra S, Chetty R. The use of Cytokeratin 19 (CK19) immunohistochemistry in lesions of the pancreas, gastrointestinal tract, and liver. *Appl Immunohistochem Mol Morphol*. 2010;18:9-15.
39. Suo Z, Holm R, Nesland JM. Squamous cell carcinomas. An immunohistochemical study of cytokeratins and involucrin in primary and metastatic tumours. *Histopathology*. 1993;23:45-54.
40. Krishna M. Diagnosis of metastatic neoplasms: an immunohistochemical approach. *Arch Pathol Lab Med*. 2010;134:207-15.
41. Uenishi T, Yamazaki O, Tanaka H, Takemura S, Yamamoto T, Tanaka S, et al. Serum cytokeratin 19 fragment (CYFRA21-1) as a prognostic factor in intrahepatic cholangiocarcinoma. *Ann Surg Oncol*. 2008;15:583-9.
42. Techasen A, Loilome W, Namwat N, Dokduang H, Jongthawin J, Yongvanit P. Cytokines released from activated human macrophages induce epithelial mesenchymal transition markers of cholangiocarcinoma cells. *Asian Pac J Cancer Prev*. 2012;13 Suppl:115-8.
43. Owens DW, Wilson NJ, Hill AJ, Rugg EL, Porter RM, Hutcheson AM, et al. Human keratin 8 mutations that disturb filament assembly observed in inflammatory bowel disease patients. *J Cell Sci*. 2004;117(Pt 10):1989-99.
44. Casanova ML, Bravo A, Ramírez A, Morreale de Escobar G, Were F, Merlino G, et al. Exocrine pancreatic disorders in transgenic mice expressing human keratin 8. *J Clin Invest*. 1999;103:1587-95.
45. Allard WJ, Matera J, Miller MC, Repollet M, Connelly MC, Rao C, et al. Tumor cells circulate in the peripheral blood of all major carcinomas but not in healthy subjects or patients with nonmalignant diseases. *Clin Cancer Res*. 2004;10:6897-904.
46. Knösel T, Emde V, Schlüns K, Schlag PM, Dietel M, Petersen I. Cytokeratin profiles identify diagnostic signatures in colorectal cancer using multiplex analysis of tissue microarrays. *Cell Oncol*. 2006;28:167-75.
47. Yoo HJ, Yun BR, Kwon JH, Ahn HS, Seol MA, Lee MJ, et al. Genetic and expression alterations in association with the sarcomatous change of cholangiocarcinoma cells. *Exp Mol Med*. 2009;41:102-15.
48. Ying W, Jiang Y, Guo L, Hao Y, Zhang Y, Wu S, et al. A dataset of human fetal liver proteome identified by subcellular fractionation and multiple protein separation and identification technology. *Mol Cell Proteomics*. 2006;5:1703-7.
49. Arroyo V, García-Martínez R, Salvatella X. Human serum albumin, systemic inflammation, and cirrhosis. *J Hepatol*. 2014;61:396-407.
50. Merlot AM, Kalinowski DS, Richardson DR. Unraveling the mysteries of serum albumin-more than just a serum protein. *Front Physiol*. 2014;5:299.
51. Dos Santos A, Court M, Thiers V, Sar S, Guettier C, Samuel D, et al. Identification of cellular targets in human intrahepatic cholangiocarcinoma using laser microdissection and accurate mass and time tag proteomics. *Mol Cell Proteomics*. 2010;9:1991-2004.
52. Waghay A, Sobotka A, Marrero CR, Estfan B, Aucejo F, Narayanan Menon KV. Serum albumin predicts survival in patients with hilar cholangiocarcinoma. *Gastroenterol Rep (Oxf)*. 2017;5:62-6.
53. Garimella PS, Sarnak MJ. Uromodulin in kidney health and disease. *Curr Opin Nephrol Hypertens*. 2017;26:136-42.
54. Liu Y, El-Achkar TM, Wu XR. Tamm-Horsfall protein regulates circulating and renal cytokines by affecting glomerular filtration rate and acting as a urinary cytokine trap. *J Biol Chem*. 2012;287:16365-78.
55. Micanovic R, Chitteti BR, Dagher PC, Srour EF, Khan S, Hato T, et al. Tamm-Horsfall Protein Regulates Granulopoiesis and Systemic Neutrophil Homeostasis. *J Am Soc Nephrol*. 2015;26:2172-82.
56. El-Achkar TM, Wu XR, Rauchman M, McCracken R, Kiefer S, Dagher PC. Tamm-Horsfall protein protects the kidney from ischemic injury by decreasing inflammation and altering TLR4 expression. *Am J Physiol Renal Physiol*. 2008;295:F534-44.
57. Wu TH, Li KJ, Yu CL, Tsai CY. Tamm-Horsfall Protein is a Potent Immunomodulatory Molecule and a Disease Biomarker in the Urinary System. *Molecules*. 2018;23. pii: E200.
58. Heitmeier M, McCracken R, Micanovic R, Khan S, El-Achkar TM. The role of tumor necrosis factor alpha in regulating the expression of Tamm-Horsfall Protein (uromodulin) in thick ascending limbs during kidney injury. *Am J Nephrol*. 2014;40:458-67.
59. Sneha P, Thirumal Kumar D, Lijo J, Megha M, Siva R, George Priya Doss C. Probing the Protein-Protein Interaction Network of Proteins Causing Maturity Onset Diabetes of the Young. *Adv Protein Chem Struct Biol*. 2018;110:167-202.
60. Hiemstra TF, Charles PD, Hester SS, Karet FE, Lilley KS. Uromodulin exclusion list improves urinary exosomal protein identification. *J Biomol Tech*. 2011;22:136-45.
61. Bryan RT, Wei W, Shimwell NJ, Collins SI, Hussain SA, Billingham LJ, et al. Assessment of high-throughput high-resolution MALDI-TOF-MS of urinary peptides for the detection of muscle-invasive bladder cancer. *Proteomics Clin Appl*. 2011;5:493-503.
62. Abrahamson M, Barrett AJ, Salvesen G, Grubb A. Isolation of six cysteine proteinase inhibitors from human urine. Their physicochemical and enzyme kinetic properties and concentrations in biological fluids. *J Biol Chem*. 1986;261:11282-9.
63. Colman RW, Wu Y, Liu Y. Mechanisms by which cleaved kininogen inhibits endothelial cell differentiation and signalling. *Thromb Haemost*. 2010;104:875-85.
64. Weidmann H, Heikaus L, Long AT, Naudin C, Schlüter H, Renné T. The plasma contact system, a protease cascade at the nexus of inflammation, coagulation and immunity. *Biochim Biophys Acta Mol Cell Res*. 2017;1864:2118-27.
65. Wang J, Wang X, Lin S, Chen C, Wang C, Ma Q, Jiang B. Identification of kininogen-1 as a serum biomarker for the early detection of advanced colorectal adenoma and colorectal cancer. *PLoS One*. 2013;8:e70519.
66. Siebert S, Porter D, Paterson C, Hampson R, Gaya D, Latosinska A, et al. Urinary proteomics can define distinct diagnostic inflammatory arthritis subgroups. *Sci Rep*. 2017;7:40473.
67. Kistler AD, Serra AL, Siwy J, Poster D, Krauer F, Torres VE, et al. Urinary proteomic biomarkers for diagnosis and risk stratification of autosomal dominant polycystic kidney disease: a multicentric study. *PLoS One*. 2013;8(1):e53016.
68. Zhang ZY, Ravassa S, Nkuipou-Kenfack E, Yang WY, Kerr SM, Koeck T, et al. Novel Urinary Peptidomic Classifier Predicts Incident Heart Failure. *J Am Heart Assoc*. 2017;6: e005432.
69. Bixel MG, Li H, Petri B, Khandoga AG, Khandoga A, Zarbock A, et al. CD99 and CD99L2 act at the same site as, but independently of, PECAM-1 during leukocyte diapedesis. *Blood*. 2010;116:1172-84.
70. Nam G, Lee YK, Lee HY, Ma MJ, Araki M, Araki K, et al. Interaction of CD99 with its paralog CD99L2 positively regulates CD99L2 trafficking to cell surfaces. *J Immunol*. 2013;191:5730-42.
71. Song J, Zhang X, Buscher K, Wang Y, Wang H, Di Russo J, et al. Endothelial Basement Membrane Laminin 511 Contributes to Endothelial Junctional Tightness and Thereby Inhibits Leukocyte Transmigration. *Cell Rep*. 2017;18:1256-69.
72. Huang RY, Kuay KT, Tan TZ, Asad M, Tang HM, Ng AH, et al. Functional relevance of a six mesenchymal gene signature in epithelial-mesenchymal transition (EMT) reversal by the triple angiokinase inhibitor, nintedanib (BIBF1120). *Oncotarget*. 2015;6:22098-113.
73. Di Meo A, Batruch I, Yousef AG, Pasic MD, Diamandis EP, Yousef GM. An integrated proteomic and peptidomic assessment of the normal human urinome. *Clin Chem Lab Med*. 2017;55:237-47.
74. Somasundaram R, Schuppan D. Type I, II, III, IV, V, and VI collagens serve as extracellular ligands for the isoforms of platelet-derived growth factor (AA, BB, and AB). *J Biol Chem*. 1996;271:26884-91.
75. Liu J, Shen JX, Wu HT, Li XL, Wen XF, Du CW, et al. Collagen 1A1 (COL1A1) promotes metastasis of breast cancer and is a potential therapeutic target. *Discov Med* 2018;25:211-23.
76. Liu S, Liao G, Li G. Regulatory effects of COL1A1 on apoptosis induced by radiation in cervical cancer cells. *Cancer Cell Int*. 2017;17:73.
77. Zhang XF, Dong M, Pan YH, Chen JN, Huang XQ, Jin Y, Shao CK. Expression pattern of cancer-associated fibroblast and its clinical relevance in intrahepatic cholangiocarcinoma. *Hum Pathol*. 2017;65:92-100.
78. Schanstra JP, Zürgbig P, Alkhalaf A, Argiles A, Bakker SJ, Beige J, et al. Diagnosis and Prediction of CKD Progression by Assessment of Urinary Peptides. *J Am Soc Nephrol*. 2015;26:1999-2010.
79. Wei R, Gao B, Shih F, Ranger A, Dearth A, Mischak H, et al. Alterations in urinary collagen peptides in lupus nephritis subjects correlate with renal dysfunction and renal histopathology. *Nephrol Dial Transplant*. 2017;32:1468-77.
80. Yasuda H, Oh CD, Chen D, de Crombrughe B, Kim JH. A Novel Regulatory Mechanism of Type II Collagen Expression via a SOX9-dependent Enhancer in Intron 6. *J Biol Chem*. 2017;292:528-38.

81. Flowers SA, Zieba A, Örnros J, Jin C, Rolfson O, Björkman LI, et al. Lubricin binds cartilage proteins, cartilage oligomeric matrix protein, fibronectin and collagen II at the cartilage surface. *Sci Rep.* 2017;7:13149.
82. Ganapathi MK, Jones WD, Sehouli J, Michener CM, Braicu IE, Norris EJ, et al. Expression profile of COL2A1 and the pseudogene SLC6A10P predicts tumor recurrence in high-grade serous ovarian cancer. *Int J Cancer.* 2016;138:679-88.
83. Murakawa K, Tada M, Takada M, Tamoto E, Shindoh G, Teramoto K, et al. Prediction of lymph node metastasis and perineural invasion of biliary tract cancer by selected features from cDNA array data. *J Surg Res.* 2004;122:184-94.
84. Nowack H, Gay S, Wick G, Becker U, Timpl R. Preparation and use in immunohistology of antibodies specific for type I and type III collagen and procollagen. *J Immunol Methods.* 1976;12:117-24.
85. Sixma JJ, van Zanten GH, Huizinga EG, van der Plas RM, Verkley M, Wu YP, et al. Platelet adhesion to collagen: an update. *Thromb Haemost.* 1997;78:434-8.
86. Yuan L, Shu B, Chen L, Qian K, Wang Y, Qian G, et al. Overexpression of COL3A1 confers a poor prognosis in human bladder cancer identified by co-expression analysis. *Oncotarget.* 2017;8:70508-20.
87. Rong L, Huang W, Tian S, Chi X, Zhao P, Liu F. COL1A2 is a Novel Biomarker to Improve Clinical Prediction in Human Gastric Cancer: Integrating Bioinformatics and Meta-Analysis. *Pathol Oncol Res.* 2018;24:129-34.
88. Lai KK, Shang S, Lohia N, Booth GC, Masse DJ, Fausto N, et al. Extracellular matrix dynamics in hepatocarcinogenesis: a comparative proteomics study of PDGFC transgenic and Pten null mouse models. *PLoS Genet.* 2011;7:e1002147.
89. Good DM, Zürbig P, Argiles A, Bauer HW, Behrens G, Coon JJ, et al. Naturally occurring human urinary peptides for use in diagnosis of chronic kidney disease. *Mol Cell Proteomics* 2010;9:2424-37.
90. Meng XY, Shi MJ, Zeng ZH, Chen C, Liu TZ, Wu QJ, Li S, Li S. The Role of COL5A2 in Patients with Muscle-Invasive Bladder Cancer: A Bioinformatics Analysis of Public Datasets Involving 787 Subjects and 29 Cell Lines. *Front Oncol.* 2019 Jan 15;8:659.
91. Groulx JF, Gagné D, Benoit YD, Martel D, Basora N, Beaulieu JF. Collagen VI is a basement membrane component that regulates epithelial cell-fibronectin interactions. *Matrix Biol.* 2011;30:195-206.
92. Yeh MH, Tzeng YJ, Fu TY, You JJ, Chang HT, Ger LP, Tsai KW. Extracellular Matrix-receptor Interaction Signaling Genes Associated with Inferior Breast Cancer Survival. *Anticancer Res.* 2018;38:4593-605.
93. Koster J, Geerts D, Favre B, Borradori L, Sonnenberg A. Analysis of the interactions between BP180, BP230, plectin and the integrin alpha6beta4 important for hemidesmosome assembly. *J Cell Sci.* 2003;116:387-99.
94. Thangavelu PU, Krenács T, Dray E, Duijf PH. In epithelial cancers, aberrant COL17A1 promoter methylation predicts its misexpression and increased invasion. *Clin Epigenetics.* 2016;8:120.
95. Chapman MH, Tidswell R, Dooley JS, Sandanayake NS, Cerec V, Deheragoda M, et al. Whole genome RNA expression profiling of endoscopic biliary brushings provides data suitable for biomarker discovery in cholangiocarcinoma. *J Hepatol.* 2012;56:877-85.
96. Therien AG, Karlish SJ, Blostein R. Expression and functional role of the gamma subunit of the Na, K-ATPase in mammalian cells. *J Biol Chem.* 1999;274:12252-6.
97. Hsu IL, Chou CY, Wu YY, Wu JE, Liang CH, Tsai YT, et al. Targeting FXD2 by cardiac glycosides potentially blocks tumor growth in ovarian clear cell carcinoma. *Oncotarget.* 2016;7:62925-38.
98. Li Y, Zhang X, Xu S, Ge J, Liu J, Li L, et al. Expression and clinical significance of FXD3 in endometrial cancer. *Oncol Lett.* 2014;8:517-22.
99. Gu YM, Thijs L, Liu YP, Zhang Z, Jacobs L, Koeck T, et al. The urinary proteome as correlate and predictor of renal function in a population study. *Nephrol Dial Transplant.* 2014;29:2260-8.
100. Ryu CS, Klein K, Zanger UM. Membrane Associated Progesterone Receptors: Promiscuous Proteins with Pleiotropic Functions - Focus on Interactions with Cytochromes P450. *Front Pharmacol.* 2017;8:159.
101. Kaluka D, Batabyal D, Chiang BY, Poulos TL, Yeh SR. Spectroscopic and mutagenesis studies of human PGRMC1. *Biochemistry.* 2015;54:1638-47.
102. Kabe Y, Nakane T, Koike I, Yamamoto T, Sugiura Y, Harada E, et al. Haem-dependent dimerization of PGRMC1/Sigma-2 receptor facilitates cancer proliferation and chemoresistance. *Nat Commun.* 2016;7:11030.
103. Latosinska A, Mokou M, Makridakis M, Mullen W, Zoidakis J, Lygirou V, et al. Proteomics analysis of bladder cancer invasion: Targeting EIF3D for therapeutic intervention. *Oncotarget.* 2017 Apr;8:69435-55.
104. Zhang Y, Ruan X, Willibald M, Seeger H, Fehm T, Neubauer H, Mueck AO. May progesterone receptor membrane component 1 (PGRMC1) predict the risk of breast cancer? *Gynecol Endocrinol.* 2016;32:58-60.
105. Tsai HW, Ho CL, Cheng SW, Lin YJ, Chen CC, Cheng PN, et al. Progesterone receptor membrane component 1 as a potential prognostic biomarker for hepatocellular carcinoma. *World J Gastroenterol.* 2018;24:1152-66.
106. Rossing K, Bosselmann HS, Gustafsson F, Zhang ZY, Gu YM, Kuznetsova T, et al. Urinary Proteomics Pilot Study for Biomarker Discovery and Diagnosis in Heart Failure with Reduced Ejection Fraction. *PLoS One.* 2016;11:e0157167.
107. Schiffer E, Vlahou A, Petrolekas A, Stravodimos K, Tauber R, Geschwend JE, et al. Prediction of muscle-invasive bladder cancer using urinary proteomics. *Clin Cancer Res.* 2009;15:4935-43.
108. Guttman O, Baranovski BM, Schuster R, Kaner Z, Freixo-Lima GS, Bahar N, et al. Acute-phase protein  $\alpha$ 1-anti-trypsin: diverting injurious innate and adaptive immune responses from non-authentic threats. *Clin Exp Immunol.* 2015;179(2):161-72.
109. Janciauskiene SM, Bals R, Koczulla R, Vogelmeier C, Köhnlein T, Welte T. The discovery of  $\alpha$ 1-antitrypsin and its role in health and disease. *Respir Med.* 2011;105:1129-39.
110. Abecassis A, Schuster R, Shahaf G, Ozeri E, Green R, Ochayon DE, et al.  $\alpha$ 1-antitrypsin increases interleukin-1 receptor antagonist production during pancreatic islet graft transplantation. *Cell Mol Immunol.* 2014;11:377-86.
111. Haddad A, Kowdley GC, Pawlik TM, Cunningham SC. Hereditary pancreatic and hepatobiliary cancers. *Int J Surg Oncol.* 2011;2011:154673.
112. Dahl M, Tybjaerg-Hansen A, Lange P, Vestbo J, Nordestgaard BG. Change in lung function and morbidity from chronic obstructive pulmonary disease in alpha1-antitrypsin MZ heterozygotes: A longitudinal study of the general population. *Ann Intern Med.* 2002;136:270-9.
113. Mota A, Sahebghadam Lotfi A, Jamshidi AR, Najavand S. Alpha 1-antitrypsin activity is markedly decreased in Wegener's granulomatosis. *Rheumatol Int.* 2014;34:553-8.
114. Sriwanitchrak P, Viyanant V, Chaijaroenkul W, Srivatanakul P, Gram HR, Eursiddhichai V, Na-Bangchang K. Proteomics analysis and evaluation of biomarkers for detection of cholangiocarcinoma. *Asian Pac J Cancer Prev.* 2011;12:1503-10.
115. Jamnongkan W, Techasen A, Thanan R, Duenngai K, Sithithaworn P, Mairiang E, et al. Oxidized alpha-1 antitrypsin as a predictive risk marker of opisthorchiasis-associated cholangiocarcinoma. *Tumour Biol.* 2013;34:695-704.
116. Cherney D, Perkins BA, Lytvyn Y, Heerspink H, Rodríguez-Ortiz ME, Mischak H. The effect of sodium/glucose cotransporter 2 (SGLT2) inhibition on the urinary proteome. *PLoS One.* 2017;12:e0186910.
117. Radons J, Dove S, Neumann D, Altmann R, Botzki A, Martin MU, Falk W. The interleukin 1 (IL-1) receptor accessory protein Toll/IL-1 receptor domain: analysis of putative interaction sites in vitro mutagenesis and molecular modeling. *J Biol Chem.* 2003;278:49145-53.
118. Mora J, Schlemmer A, Wittig I, Richter F, Putyrski M, Frank AC, et al. Interleukin-38 is released from apoptotic cells to limit inflammatory macrophage responses. *J Mol Cell Biol.* 2016;8:426-38.
119. Bahi N, Friocourt G, Carrié A, Graham ME, Weiss JL, Chafey P, et al. IL1 receptor accessory protein like, a protein involved in X-linked mental retardation, interacts with Neuronal Calcium Sensor-1 and regulates exocytosis. *Hum Mol Genet.* 2003;12(12):1415-25.
120. Khan JA, Brint EK, O'Neill LA, Tong L. Crystal structure of the Toll/interleukin-1 receptor domain of human IL-1RAPL. *J Biol Chem.* 2004;279:31664-70.
121. Lai RC, Yeo RWY, Tan SS, Zhang B, Yin Y, Sze NSK, et al. Mesenchymal Stem Cell Exosomes: The Future MSC-Based Therapy?. In: Chase L, Vemuri M, editors. *Mesenchymal Stem Cell Therapy. Stem Cell Biology and Regenerative Medicine.* Totowa, NJ: Humana Press; 2013. p. 39-61.
122. Han Y, Mora J, Putyrski M, Huard A, da Silva P, Scholz A, et al. IL-38 Restricts Skin Inflammation and Anti-Tumor Immunity by Limiting IL-17 Production from  $\gamma\delta$  T Cells. *Cell Reports.* 2018; doi:10.2139/ssrn.3213912.
123. Gao L, Yang X, Zhang H, Yu M, Long J, Yang T. Inhibition of miR-10a-5p suppresses cholangiocarcinoma cell growth through downregulation of Akt pathway. *Onco Targets Ther.* 2018;11:6981-94.

124. Pettersen RD, Bernard G, Olafsen MK, Pourtein M, Lie SO. CD99 signals caspase-independent T cell death. *J Immunol.* 2001;166:4931-42.
125. Lee KJ, Lee SH, Yadav BK, Ju HM, Kim MS, Park JH, et al. The activation of CD99 inhibits cell-extracellular matrix adhesion by suppressing  $\beta(1)$  integrin affinity. *BMB Rep.* 2012;45:159-64.
126. Edlund K, Lindskog C, Saito A, Berglund A, Pontén F, Göransson-Kultima H, et al. CD99 is a novel prognostic stromal marker in non-small cell lung cancer. *Int J Cancer.* 2012;131:2264-73.
127. Kovar H, Dworzak M, Strehl S, Schnell E, Ambros IM, Ambros PF, Gardner H. Overexpression of the pseudoautosomal gene MIC2 in Ewing's sarcoma and peripheral primitive neuroectodermal tumor. *Oncogene.* 1990;5:1067-70.
128. Zhou G, Yang W, Yu L, Yu T, Liu Z. CD99 refers to the activity of inflammatory bowel disease. *Scand J Gastroenterol.* 2017;52:359-64.
129. Choi YL, Xuan YH, Shin YK, Chae SW, Kook MC, Sung RH, et al. An immunohistochemical study of the expression of adhesion molecules in gallbladder lesions. *J Histochem Cytochem.* 2004;52:591-601.
130. Lee JH, Kim SH, Wang LH, Choi YL, Kim YC, Kim JH, et al. Clinical significance of CD99 down-regulation in gastric adenocarcinoma. *Clin Cancer Res.* 2007;13:2584-91.
131. Zurick KM, Qin C, Bernards MT. Mineralization induction effects of osteopontin, bone sialoprotein, and dentin phosphoprotein on a biomimetic collagen substrate. *J Biomed Mater Res A.* 2013;101:1571-81.
132. Sodek J, Zhu B, Huynh MH, Brown TJ, Ringuette M. Novel functions of the matricellular proteins osteopontin and osteonectin/SPARC. *Connect Tissue Res.* 2002;43:308-19.
133. Zhu B, Suzuki K, Goldberg HA, Rittling SR, Denhardt DT, McCulloch CA, Sodek J. Osteopontin modulates CD44-dependent chemotaxis of peritoneal macrophages through G-protein-coupled receptors: evidence of a role for an intracellular form of osteopontin. *J Cell Physiol.* 2004;198:155-67.
134. Ashkar S, Weber GF, Panoutsakopoulou V, Sanchirico ME, Jansson M, Zawaideh S, et al. Eta-1 (osteopontin): an early component of type-1 (cell-mediated) immunity. *Science.* 2000;287:860-4.
135. Rangaswami H, Bulbule A, Kundu GC. Osteopontin: role in cell signaling and cancer progression. *Trends Cell Biol.* 2006;16:79-87.
136. Wang X, Lopategi A, Ge X, Lu Y, Kitamura N, Urtasun R, et al. Osteopontin induces ductular reaction contributing to liver fibrosis. *Gut.* 2014;63:1805-18.
137. Klement JD, Paschall AV, Redd PS, Ibrahim ML, Lu C, Yang D, et al. An osteopontin/CD44 immune checkpoint controls CD8+ T cell activation and tumor immune evasion. *J Clin Invest.* 2018;128:5549-60.
138. Shurin MR. Osteopontin controls immunosuppression in the tumor microenvironment. *J Clin Invest.* 2018;128:5209-12.
139. Loosen SH, Roderburg C, Kauertz KL, Pombeiro I, Leyh C, Benz F, et al. Elevated levels of circulating osteopontin are associated with a poor survival after resection of cholangiocarcinoma. *J Hepatol.* 2017;67:749-57.
140. Zheng Y, Zhou C, Yu XX, Wu C, Jia HL, Gao XM, et al. Osteopontin promotes metastasis of intrahepatic cholangiocarcinoma through recruiting MAPK1 and mediating Ser675 phosphorylation of  $\beta$ -Catenin. *Cell Death Dis.* 2018;9:179.
